# Supplementary material for: Novel bivalent spermine-based neutral neogalactolipids for modular gene delivery systems
Source: Royal Society of Chemistry journal article supplement (doi:10.1039/c5ra17389b), 2015-01-01

## **Novel bivalent spermine-based neutral neogalactolipids for modular gene delivery systems**

E.A. Ivanova,<sup>a</sup> A.V. Filatov,<sup>b</sup> N.G. Morozova,<sup>a</sup> M.A. Zenkova<sup>b</sup> and M.A. Maslov<sup>a\*</sup>  
<sup>a</sup> *Lomonosov Moscow State University of Fine Chemical Technologies (MITHT), 86 Vernadskogo ave., Moscow, 119571 Russian Federation*

<sup>b</sup> *Institute of Chemical Biology and Fundamental Medicine SB RAS, 8 Lavrentieva ave, Novosibirsk, 630090, Russian Federation*

### **Supplementary Information**

---

\* Corresponding author. Tel: +7(495)9368903; Fax: +7(495)9368901.

*E-mail address:* [mamaslov@mail.ru](mailto:mamaslov@mail.ru) (M.A. Maslov)

**8-amino-1-(2,3,4,6-tetra-*O*-acetyl- $\beta$ -D-galactopyranosyloxy)-3,6-dioxaoctane (4a)** was prepared within 3 synthetic steps starting from 2,3,4,6-tetra-*O*-acetyl- $\alpha$ -D-galactopyranosyl bromide.

1) HgCN<sub>2</sub> (2.247 g, 8.896 mmol) and 4 Å crushed molecular sieves were added to a solution of 3,6-dioxa-8-chlorooctane-1-ol (1.00g, 5.931 mmol) in dry DCM (15 mL) at 20°C under stirring. After 15 min, the solution of 2,3,4,6-tetra-*O*-acetyl- $\alpha$ -D-galactopyranosyl bromide (3.658 g, 8.896 mmol) in dry DCM (15 mL) was added dropwise within 1 h. After 4 h at 40 °C, the reaction mixture was cooled to ambient temperature, filtered through Celite 545® pad, and washed with 20% aq. KI (4 × 50 mL), water (3 × 30 mL). The organic layer was dried (Na<sub>2</sub>SO<sub>4</sub>), filtered, and concentrated under diminished pressure. The residue was purified by column chromatography on a silica gel (toluene – ethyl acetate, 2:1) to give 8-chloro-1-(2,3,4,6-tetra-*O*-acetyl- $\beta$ -D-galactopyranosyloxy)-3,6-dioxaoctane (2.078 g, 75%) as a yellowish oil.  $\delta_{\text{H}}$  (300 MHz; CDCl<sub>3</sub>; Me<sub>4</sub>Si): 1.91 (3H, s), 1.98 (3H, s), 2.99 (3H, s), 2.08 (3H, s, 4 OCOMe), 3.50-3.64 (8 H, m, CH<sub>2</sub>O(CH<sub>2</sub>)<sub>2</sub>OCH<sub>2</sub>), 3.65-3.75 (3 H, m, CH<sub>2</sub>Cl, OCH<sub>a</sub>H), 3.81-3.93 (2 H, m, 5-H Gal, OCH<sub>b</sub>H), 4.06 (1 H, dd, *J* 6.5, 11.1, 6-H<sub>a</sub> Gal), 4.07 (1 H, dd, *J* 6.5, 11.1, 6-H<sub>b</sub> Gal), 4.52 (1 H, d, *J* 8.0, 1-H Gal), 4.95 (1 H, dd, *J* 3.4, 10.5, 3-H Gal), 5.14 (1 H, dd, *J* 8.0, 10.5, 2-H Gal), 5.32 (1 H, dd, *J* 1.0, 3.4, 4-H Gal).  $\delta_{\text{C}}$  (75 MHz; CDCl<sub>3</sub>): 20.56, 20.64, 20.66, 20.76, 42.78, 61.25, 67.01, 68.73, 69.02, 70.33, 70.55, 70.58, 70.61, 70.83, 101.25, 169.46, 170.12, 170.24, 170.36. *m/z*: 521.893 (M<sup>+</sup>+Na, 100%).

2) Sodium azide (0.542 g, 8.329 mmol) was added to a solution of 8-azido-1-(2,3,4,6-tetra-*O*-acetyl- $\beta$ -D-galactopyranosyloxy)-3,6-dioxaoctane (2.078 g, 4.164 mmol) in dry DMF (100 mL) and stirred for 40 h at 100° C. The solvent was removed under diminished pressure, the residue was dissolved in DCM (70 mL) and washed by 3% aq. HCl (4 × 20 mL) and water (3 × 20 mL). The organic layer was dried (Na<sub>2</sub>SO<sub>4</sub>), filtered, the solvent was removed under diminished pressure. Column chromatography on silica gel (toluene – ethylacetate, 1:2) gave 8-azido-1-(2,3,4,6-tetra-*O*-acetyl- $\beta$ -D-galactopyranosyloxy)-3,6-dioxaoctane (6) (1.747 g, 83%) as a yellowish oil.  $\delta_{\text{H}}$  (300 MHz; CDCl<sub>3</sub>; Me<sub>4</sub>Si): 1.92 (3H, s), 1.98 (3H, s), 2.00 (3H, s), 2.08 (3H, s, 4 OCOMe), 3.35 (2 H, t, *J* 5.0, CH<sub>2</sub>N<sub>3</sub>), 3.40-3.64 (8 H, m, CH<sub>2</sub>O(CH<sub>2</sub>)<sub>2</sub>OCH<sub>2</sub>), 3.65-3.75 (1 H, m, OCH<sub>a</sub>H), 3.81-3.93 (2 H, m, 5-H Gal, OCH<sub>b</sub>H), 4.06 (1 H, dd, *J* 6.6, 11.1, 6-H<sub>a</sub> Gal), 4.11 (1 H, dd, *J* 6.5, 11.1, 6-H<sub>b</sub> Gal), 4.51 (1 H, d, *J* 8.0, 1-H Gal), 4.95 (1 H, dd, *J* 3.4, 10.5, 3-H Gal), 5.15 (1 H, dd, *J* 8.0, 10.5, 2-H Gal), 5.32 (1 H, dd, *J* 1.0, 3.4, 4-H Gal).  $\delta_{\text{C}}$  (75 MHz; CDCl<sub>3</sub>): 20.72, 20.81, 20.90, 50.77, 61.39, 67.14, 68.89, 69.17, 70.12, 70.51, 70.73, 70.78, 70.82, 71.00, 101.45, 169.63, 170.31, 170.41. *m/z*: 528.031 (M<sup>+</sup>+Na, 100%).

3) A catalytic amount of 10% Pd/C was added to a solution of 8-azido-1-(2,3,4,6-tetra-*O*-acetyl- $\beta$ -D-galactopyranosyloxy)-3,6-dioxaoctane (6) (0.721 g, 1.978 mmol) and ammonium formate (0.500 g, 7.913 mmol) in methanol (10 mL) heated to 60 °C. After 15 min the catalyst was filtered off and methanol was removed under diminished pressure. Column chromatography on a silica gel (DCM – methanol, 10:1) gave compound **4a** (0.308 g, 45%) as a colorless oil.  $\delta_{\text{H}}$  (300 MHz; CDCl<sub>3</sub>; Me<sub>4</sub>Si): 1.98 (3H, s), 2.05 (3H, s), 2.08 (3H, s), 2.18 (3H, s, 4 OCOMe), 3.15-3.26 (2 H, m, CH<sub>2</sub>NH<sub>2</sub>), 3.49-3.70 (8 H, m, CH<sub>2</sub>O(CH<sub>2</sub>)<sub>2</sub>OCH<sub>2</sub>), 3.73-4.04 (3 H, m, OCH<sub>2</sub>, 5-H- Gal), 4.05-4.22 (2 H, m, 6-H Gal), 4.55 (1 H, d, *J* 7.9, 1-H Gal), 5.03 (1 H, dd, *J* 3.3, 10.5, 3-H Gal), 5.16 (1 H, dd, *J* 7.9, 10.5, 2-H Gal), 5.38 (1 H, dd, *J* 0.8, 3.3, 4-H Gal), 5.90-6.70 (2 H, m, NH<sub>2</sub>).  $\delta_{\text{C}}$  (75 MHz; CDCl<sub>3</sub>): 20.74, 20.84, 20.86, 21.03, 39.95, 61.33, 66.83, 67.11, 68.95, 69.19, 70.10, 70.21, 70.47, 70.81, 70.83, 101.38, 170.14, 170.30, 170.42, 170.63. *m/z*: 480.400 (M<sup>+</sup> + H, 100%)

**(9-Aza-12-carboxy-3,6-dioxa-10-oxododecyl)-2,3,4,6-tetra-*O*-acetyl- $\beta$ -D-galactopyranoside (4b).** To a solution of compound **4a** (1.250 g, 2.607 mmol) in dry CH<sub>2</sub>Cl<sub>2</sub> (10 mL) anhydrous Et<sub>3</sub>N (0.27 mL, 3.84 mmol) and succinic anhydride (0.211 g, 2.112 mmol) were added. After keeping 40 min at 40 °C reaction mixture was cooled to 24 °C, washed with 3% aq. HCl (1 × 15 mL), and water to pH 7. The organic layer was dried (Na<sub>2</sub>SO<sub>4</sub>), filtered, and concentrated under diminished pressure. The residue was purified by column chromatography (CHCl<sub>3</sub> – MeOH – 1% aq. AcOH, 18 : 1 : 0.01 → 10 : 1 : 0.01) to give compound **4b** as a colorless oil (1.044 g, 69%).  $[\alpha]_{\text{D}}^{27}$  -9.3 (*c* 1.0, CHCl<sub>3</sub>). MALDI-TOFMS: *m/z*: 602.320 [M + Na]<sup>+</sup>; Calcd for C<sub>24</sub>H<sub>37</sub>NNaO<sub>15</sub>: 602.206 [M + Na]<sup>+</sup>. <sup>1</sup>H NMR (300 MHz): 1.94 (s, 3 H), 2.01 (s, 3 H), 2.02 (s, 3 H), 2.10 (s, 3 H, 4 COCH<sub>3</sub>), 2.39-2.51 (m, 2 H) and 2.53-2.65 (m, 2 H, C(O)CH<sub>2</sub>CH<sub>2</sub>C(O)), 3.34-3.43 (m, 2 H, CH<sub>2</sub>N), 3.47-3.76 (m, 9 H, CH<sub>2</sub>O(CH<sub>2</sub>)<sub>2</sub>OCH<sub>2</sub>, OCH<sub>a</sub>H), 3.85-3.99 (m, 2 H, OCH<sub>b</sub>H, H-5 Gal), 4.01-4.19 (m, 2 H, H-6 Gal), 4.52 (d, 1 H, *J* 7.9, H-1 Gal), 4.99 (dd, 1

H, *J* 3.3, 10.5, H-3 Gal), 5.14 (dd, 1 H, *J* 7.9, 10.5, H-2 Gal), 5.34 (dd, 1 H, *J* 0.8, 3.3, H-4 Gal), 6.65-6.88 (m, 1 H, NH); <sup>13</sup>C NMR (75 MHz): 20.62, 20.69, 20.72, 20.82, 30.47, 31.06, 39.45, 61.32, 67.11, 68.91, 69.13, 69.66, 70.18, 70.64, 70.71, 70.88, 101.33, 169.73, 170.24, 170.32, 170.54, 172.94, 176.61.

**4,9-Bis-[4-(benzyloxy)-4-oxobutanoyl]-1,12-bis-(trifluoroacetamido)-4,9-diazadodecane (7).** Ethyl trifluoroacetate (1.26 mL, 10.626 mmol) and water (11 mL, 5.9323 mmol) were added dropwise to a solution of spermine (**5**) (0.500 g, 2.471 mmol) in acetonitrile (15 mL). Reaction mixture was refluxed within 6 h, after removing of organic solvent in a vacuum the compound **6** was yielded (0.965 g, 99% technical grade) as white amorphous solid. To a solution of bis-trifluoroacetamide **6** (0.200 g, 0.507 mmol) in dry CH<sub>2</sub>Cl<sub>2</sub> (2 mL) anhydrous pyridine (1.4 mL, 13.133 mmol) and DMAP (9 mg, 0.076 mmol) were added. Reaction mixture was cooled to 0 °C, and the chloride of succinic acid monobenzyl ester (0.460 g, 2.029 mmol) was added dropwise within 15 min, and mixture was kept for 1 h. Reaction mixture was diluted by CH<sub>2</sub>Cl<sub>2</sub> (20 mL), washed with 3% aq. HCl (2 × 10 mL). The organic layer was dried (Na<sub>2</sub>SO<sub>4</sub>), filtered, and concentrated under diminished pressure. The residue was purified by column chromatography on silica gel (petroleum ether – ethyl acetate, 1 : 5) to give compound **7** (145 mg, 37%) as a colorless oil. MALDI-TOFMS: *m/z* 797.570 [M + Na]<sup>+</sup>; Calcd for C<sub>36</sub>H<sub>44</sub>F<sub>6</sub>N<sub>4</sub>NaO<sub>8</sub>: 797.296 [M + Na]<sup>+</sup>. <sup>1</sup>H NMR (300 MHz): 1.40-1.68 (m, 8 H, NCH<sub>2</sub>(CH<sub>2</sub>)<sub>2</sub>CH<sub>2</sub>N, NCH<sub>2</sub>CH<sub>2</sub>), 2.45-2.73 (m, 8 H, C(O)CH<sub>2</sub>CH<sub>2</sub>C(O)), 3.05-3.42 (m, 12 H, 6 CH<sub>2</sub>N), 5.03 (wide s, 4 H, 2 CH<sub>2</sub>Ph), 7.20 – 7.35 (m, 10 H, 2 Ph).

**4,9-Bis-[4-(carboxy)butanoyl]-1,12-bis-(trifluoroacetamido)-4,9-diazadodecane (8).** A catalytic amount of 10% Pd/C was added to a solution of compound **7** (49 mg, 0.063 mmol) and ammonium formate (8 mg, 0.126 mmol) in methanol (10 mL), and a reaction mixture was heated to 60 °C. After 15 min the catalyst was filtered off and methanol was removed under diminished pressure. Column chromatography on a silica gel (CHCl<sub>3</sub> – MeOH, 1 : 1) gave compound **8** (36.6 mg, 97%) as a colorless oil. MALDI-TOFMS: *m/z* 594.213 [M]<sup>+</sup>; Calcd for C<sub>22</sub>H<sub>32</sub>F<sub>6</sub>N<sub>4</sub>O<sub>8</sub>: 594.212 [M]<sup>+</sup>. <sup>1</sup>H NMR (300 MHz): 1.29-1.60 (m, 4 H, NCH<sub>2</sub>(CH<sub>2</sub>)<sub>2</sub>CH<sub>2</sub>N), 1.61-1.89 (m, 4 H, 2 NCH<sub>2</sub>CH<sub>2</sub>), 2.23-2.68 (m, 8 H, C(O)CH<sub>2</sub>CH<sub>2</sub>C(O)), 3.09-3.42 (m, 12 H, CH<sub>2</sub>N).

**1,28-Bis-{{rac-2,3-bis(tetradecyloxy)propyloxy}carbonylamino}-N<sup>12</sup>,N<sup>17</sup>-bis-[3-(trifluoroacetamido)propyl]-7,12,17,22-tetraaza-8,11,18,21-tetraoxooctacosane (9a).** A solution of compound **8** (75 mg 0.127 mmol) and DIEA (66 μL, 0.380 mmol) in anhydrous DMF (2 mL) was cooled to 0 °C and stirred within 10 min. A solution of compound **2a** (0.238 g, 0.380 mmol) and HBTU (144 mg, 0.380 mmol) in anhydrous DMF (3 mL) was added dropwise into the reaction mixture and stirred within 4 day at 24 °C. DMF and DIEA were evaporated; the residue was dissolved in CHCl<sub>3</sub>, washed with 3% aq. HCl (2 × 10 mL), and water to pH 7. The organic layer was dried (Na<sub>2</sub>SO<sub>4</sub>), filtered, and concentrated under diminished pressure. The residue was purified by column chromatography on silica gel (toluene - CHCl<sub>3</sub> – MeOH – acetone, 1 : 1 : 0.1 : 0.1) to give 0.175 g (72%) of compound **9a** as a colorless oil. MALDI-TOFMS: *m/z* 1835.768 [M + Na]<sup>+</sup>; Calcd for C<sub>98</sub>H<sub>184</sub>F<sub>6</sub>N<sub>8</sub>NaO<sub>14</sub>: 1834.373 [M + Na]<sup>+</sup>. <sup>1</sup>H NMR (300 MHz): 0.81 (t, 12 H, *J* 6.7, 4 CH<sub>2</sub>CH<sub>3</sub>), 1.09-1.32 (m, 96 H, 4 (CH<sub>2</sub>)<sub>11</sub>, 2 NHCH<sub>2</sub>CH<sub>2</sub>(CH<sub>2</sub>)<sub>2</sub>), 1.32-1.73 (m, 24 H, 6 NCH<sub>2</sub>CH<sub>2</sub>, 4 OCH<sub>2</sub>CH<sub>2</sub>NCH<sub>2</sub>(CH<sub>2</sub>)<sub>2</sub>CH<sub>2</sub>N), 2.04-2.14 (m, 4 H) и 2.39-2.52 (m, 4 H, 2 C(O)CH<sub>2</sub>CH<sub>2</sub>C(O)), 3.01-3.63 (m, 36 H, 4 CH<sub>2</sub>N, 6 NHCH<sub>2</sub>, 2 OCH<sub>2</sub>CH, 4 OCH<sub>2</sub>CH<sub>2</sub>), 4.01 (dd, 2 H, *J* 11.4, 4.0, 2 CH<sub>2</sub>OC(O)), 4.11 (dd, 2 H, *J* 11.4, 5.4, 2 CH<sub>2</sub>OC(O)), 4.71-4.90 (m, 2 H, 2 NH), 5.82-6.18 (m, 2 H, 2 NH). <sup>13</sup>C NMR (75 MHz): 14.21, 22.78, 24.92, 26.13, 26.18, 26.25, 26.28, 26.36, 26.93, 27.84, 28.20, 28.38, 29.45, 29.59, 29.75, 29.79, 29.89, 30.09, 31.06, 31.31, 31.46, 32.01, 36.00, 37.36, 39.47, 40.87, 42.45, 44.22, 44.59, 47.53, 64.30, 65.26, 70.49, 70.69, 71.86, 76.95, 79.11, 116.17 (q, *J* 287.8, C(O)CF<sub>3</sub>), 156.61, 157.08, 157.56, 157.98 (q, *J* 37.0, C(O)CF<sub>3</sub>), 171.81, 172.09, 172.33, 172.67, 173.42.

**1,28-Bis-[(cholest-5-en-3β-yloxy)carbonylamino]-N<sup>12</sup>,N<sup>17</sup>-bis-[3-(trifluoroacetamido)propyl]-7,12,17,22-tetraaza-8,11,18,21-tetraoxooctacosane (9b)** was synthesized as described for **9a** using compound **8** (36 mg, 0.061 mmol), HBTU (69 mg, 0.182 mmol), compound **2b** (96 mg, 0.182 mmol) and DIEA (32 μL, 0.182 mmol). Compound **9b** was obtained in 89% yield (87 mg). MALDI-TOFMS: *m/z* 1639.589 [M + Na]<sup>+</sup>; Calcd for C<sub>90</sub>H<sub>148</sub>F<sub>6</sub>N<sub>8</sub>NaO<sub>10</sub>: 1638.112 [M + Na]<sup>+</sup>. <sup>1</sup>H NMR (300 MHz): 0.61 (s, 6 H, 2 C(13)Me), 0.78 (d, 6 H, *J* 6.6, 2 C(25)Me), 0.79 (d, 6 H, *J* 6.6, 2 C(25)Me), 0.84 (d, 6 H, *J*

6.4, 2 C(20)Me), 0.94 (s, 6 H, 2 C(10)Me), 0.90–2.00 (m, 75 H, Chol protons, 6 NHCH<sub>2</sub>CH<sub>2</sub>, NCH<sub>2</sub>(CH<sub>2</sub>)<sub>2</sub>CH<sub>2</sub>N, 2 NHCH<sub>2</sub>CH<sub>2</sub>(CH<sub>2</sub>)<sub>2</sub>), 2.15–2.28 (m, 4 H, 2 H<sub>2</sub>C(4) Chol), 2.41–2.50 (m, 4 H) и 2.51–2.62 (m, 4 H, 2 C(O)CH<sub>2</sub>CH<sub>2</sub>C(O)), 3.00–3.41 (m, 20 H, 4 NCH<sub>2</sub>, 6 NHCH<sub>2</sub>), 4.35–4.46 (m, 2 H, H(3) Chol), 4.65–4.76 (m, 2 H, 2 NH), 5.29 (br. s, 2 H, H(6) Chol), 5.84–6.20 (m, 2 H, 2 NH). <sup>13</sup>C NMR (75 MHz): 11.97, 18.83, 19.43, 21.16, 22.67, 22.92, 23.96, 24.40, 28.12, 28.30, 28.34, 32.01, 32.03, 35.91, 36.31, 36.69, 37.12, 39.64, 39.87, 42.44, 50.16, 56.29, 56.82, 74.37, 79.19, 116.21 (q, *J* 287.8, C(O)CF<sub>3</sub>), 122.56, 139.99, 156.43, 157.25, 157.49, 171.89, 172.15, 172.40, 172.70, 173.43.

**1,28-Bis-{{rac-2,3-bis(tetradecyloxy)propyloxy}carbonylamino}-N<sup>12</sup>,N<sup>17</sup>-bis-[3-aminopropyl]-7,12,17,22-tetraaza-8,11,18,21-tetraoxooctacosane (10a).** K<sub>2</sub>CO<sub>3</sub> (52 mg, 0.379 mmol) was added to a solution of compound **9a** (0.122 g, 0.063 mmol) in MeOH (5 mL), and a reaction mixture was stirred 48 h at 50 °C. After cooling to 24 °C methanol was evaporated, the residue was dissolved in CH<sub>2</sub>Cl<sub>2</sub> (30 mL), washed with water to pH 7. The organic layer was dried (Na<sub>2</sub>SO<sub>4</sub>), filtered, and concentrated under diminished pressure. The residue was purified by column chromatography on silica gel (CHCl<sub>3</sub> – MeOH – aq. NH<sub>3</sub>, 4 : 1 : 0.2) to give compound **9a** as a colorless oil (63 mg, 60%). MALDI-TOFMS: *m/z* 1642.934 [M + Na]<sup>+</sup>; Calcd for C<sub>94</sub>H<sub>186</sub>N<sub>8</sub>NaO<sub>12</sub>: 1642.409 [M + Na]<sup>+</sup>.

**1,28-Bis-[(choles-5-en-3β-yloxy)carbonylamino]-N<sup>12</sup>,N<sup>17</sup>-bis-[3-aminopropyl]-7,12,17,22-tetraaza-8,11,18,21-tetraoxooctacosane (10b).** To a solution of compound **9b** (41 mg, 0.025 mmol) in MeOH (5 mL) 0.01 *M* solution of NaOH in MeOH (20 mL) was added and a mixture was stirred for 22 h at 24 °C. MeOH was removed in a vacuum; the residue was dissolved in CH<sub>2</sub>Cl<sub>2</sub> (50 mL), washed with water, dried over Na<sub>2</sub>SO<sub>4</sub>, filtered and evaporated. Product was isolated by means of column chromatography (CHCl<sub>3</sub> – MeOH – aq. NH<sub>3</sub>, 4 : 1 : 0.2). Compound **10b** was obtained in 81% yield (30 mg) as a colorless oil. MALDI-TOFMS: *m/z* 1443.601 [M + Na]<sup>+</sup>; Calcd for C<sub>94</sub>H<sub>186</sub>N<sub>8</sub>NaO<sub>12</sub>: 1444.132 [M + Na]<sup>+</sup>.

**1,28-Bis-{{rac-2,3-bis(tetradecyl)propyloxy}carbonylamino}-N<sup>12</sup>,N<sup>17</sup>-bis-[17-(2,3,4,6-tetra-*O*-acetyl-β-D-galactopyranosyloxy)-4,9-diaza-12,15-dioxa-5,8-dioxoheptadecyl]-7,12,17,22-tetraaza-8,11,18,21-tetraoxooctacosane (11a)** was synthesized as described for **9a** using compound **10a** (63 mg, 0.039 mmol), HBTU (44 mg, 0.116 mmol), compound **4b** (68 mg, 0.116 mmol) and DIEA (20 μL, 0.116 mmol). Column chromatography on a silica gel (CHCl<sub>3</sub> – MeOH, 40 : 1) gave compound **11a** (47 mg, 43%) as a colorless oil. MALDI-TOFMS: *m/z* 2766.153 [M + Na + H]<sup>+</sup>; Calcd for C<sub>142</sub>H<sub>257</sub>N<sub>10</sub>NaO<sub>40</sub>: 2765.828 [M + Na + H]<sup>+</sup>. <sup>1</sup>H NMR (300 MHz): 0.81 (t, 12 H, *J* 6.1, 4 CH<sub>2</sub>CH<sub>3</sub>), 1.13–1.29 (m, 96 H, 4 (CH<sub>2</sub>)<sub>11</sub>, 2 NHCH<sub>2</sub>CH<sub>2</sub>(CH<sub>2</sub>)<sub>2</sub>), 1.32–1.73 (m, 24 H, 6 NCH<sub>2</sub>CH<sub>2</sub>, 4 OCH<sub>2</sub>CH<sub>2</sub>NCH<sub>2</sub>(CH<sub>2</sub>)<sub>2</sub>CH<sub>2</sub>N), 1.92, 1.98, 1.99, 2.08 (4 s, 24 H, 8 C(O)CH<sub>3</sub>), 2.39–2.51 (m, 16 H, 4 C(O)CH<sub>2</sub>CH<sub>2</sub>C(O)), 2.98–3.14 (m, 12 H, 6 NHCH<sub>2</sub>), 3.16–3.62 (m, 44 H, 4 CH<sub>2</sub>N, 2 CH<sub>2</sub>NH, 2 CH<sub>2</sub>O(CH<sub>2</sub>)<sub>2</sub>OCH<sub>2</sub>, 2 OCH<sub>a</sub>H, 4 OCH<sub>2</sub>CH<sub>2</sub>, 2 OCH<sub>2</sub>CH), 3.80–4.15 (m, 12 H, 2 OCH<sub>b</sub>H, 2 H-5 Gal, 4 H-6 Gal, 2 CH<sub>2</sub>OC(O)), 4.50 (d, 2 H, *J* 7.9, 2 H-1 Gal), 4.96 (dd, 2 H, *J* 3.4, 10.4, 2 H-3 Gal), 5.13 (dd, 2 H, *J* 7.9, 10.4, 2 H-2 Gal), 5.32 (d, *J* 3.4, 2 H, 2 H-4 Gal), 6.15–6.20 (m, 2 H, 2 NH), 6.53–6.75 (m, 2 H, 4 NH), 6.91–7.15 (m, 2 H, 2 NH). <sup>13</sup>C NMR (75 MHz): 14.20, 20.68, 20.75, 20.77, 20.88, 22.77, 26.13, 26.19, 26.41, 26.51, 29.44, 29.59, 29.74, 29.78, 29.90, 30.11, 31.71, 32.00, 39.38, 39.50, 40.99, 54.90, 61.36, 64.27, 67.16, 68.95, 69.23, 69.89, 70.25, 70.33, 70.56, 70.68, 70.79, 70.94, 71.86, 76.99, 101.43, 156.58, 169.71, 170.24, 170.35, 170.52, 172.46, 172.56, 172.61, 172.68, 172.94.

**1,28-Bis-[(cholest-5-en-3β-yloxy)carbonylamino]-N<sup>12</sup>,N<sup>17</sup>-bis-[17-(2,3,4,6-tetra-*O*-acetyl-β-D-galactopyranosyloxy)-4,9-diaza-12,15-dioxa-5,8-dioxoheptadecyl]-7,12,17,22-tetraaza-8,11,18,21-tetraoxooctacosane (11b)** was synthesized as described for **9a** using compound **10b** (30 mg, 0.021 mmol), HBTU (24 mg, 0.063 mmol), compound **4b** (50 mg, 0.084 mmol) and DIEA (10 μL, 0.084 mmol). Column chromatography on a silica gel (toluene - CHCl<sub>3</sub> – MeOH – acetone, 1 : 1 : 0.2 : 0.5) gave compound **11b** (32 mg, 47%) as a colorless oil. [α]<sub>D</sub><sup>26</sup> -4.0 (*c* 0.5, CHCl<sub>3</sub> - CH<sub>3</sub>OH, 1 : 1). MALDI-TOFMS: *m/z* 2570.471 [M + Na + H]<sup>+</sup>; Calcd for C<sub>134</sub>H<sub>220</sub>N<sub>10</sub>NaO<sub>36</sub>: 2569.567 [M + Na + H]<sup>+</sup>. <sup>1</sup>H NMR (300 MHz): 0.61 (s, 6 H, 2 C(13)Me), 0.78 (d, 6 H, *J* 6.6, 2 C(25)Me), 0.80 (d, 6 H, *J* 6.6, 2 C(25)Me), 0.85 (d, 6 H, *J* 6.4, 2 C(20)Me), 0.94 (s, 6 H, 2 C(10)Me), 0.90–1.60 (m, 72 H, Chol protons, 6 NHCH<sub>2</sub>CH<sub>2</sub>, NCH<sub>2</sub>(CH<sub>2</sub>)<sub>2</sub>CH<sub>2</sub>N, 2 NHCH<sub>2</sub>CH<sub>2</sub>(CH<sub>2</sub>)<sub>2</sub>), 1.66–1.89 (m, 14 H, Chol protons), 1.92, 1.96, 1.99, 2.08 (4 s, 24 H, 8 COCH<sub>3</sub>), 2.13–2.34 (m, 4 H, 2 H<sub>2</sub>C(4) Chol), 2.40–2.64 (m, 16 H, 4

C(O)CH<sub>2</sub>CH<sub>2</sub>C(O)), 3.00-3.49 (m, 24 H, 4 NCH<sub>2</sub>, 8 NHCH<sub>2</sub>), 3.50-3.73 (m, 14H, 2 CH<sub>2</sub>O(CH<sub>2</sub>)<sub>2</sub>OCH<sub>2</sub>, 2 OCH<sub>a</sub>H), 3.82-3.97 (m, 4 H, 2 OCH<sub>b</sub>H, 2 H-5 Gal), 4.06 (dd, 1 H, *J* 6.6, 11.2) and 4.11 (dd, 1 H, *J* 6.7, 11.2, 4 H-6 Gal), 4.35-4.46 (m, 2 H, H(3) Chol), 4.50 (d, 2 H, *J* 7.9, 2 H-1 Gal), 4.96 (dd, 2 H, *J* 3.4, 10.4, 2 H-3 Gal), 5.13 (dd, 2 H, *J* 7.9, 10.4, 2 H-2 Gal), 5.27-5.31 (m, 2 H, H(6) Chol), 5.32 (dd, *J* 1.1, 3.4, 2 H, 2 H-4 Gal). <sup>13</sup>C NMR (75 MHz): 11.99, 18.84, 19.48, 20.74, 20.81, 20.83, 20.94, 21.17, 22.69, 22.95, 23.97, 24.42, 26.44, 26.55, 27.71, 28.14, 28.36, 28.66, 29.54, 29.79, 29.83, 29.99, 30.15, 31.06, 31.71, 31.79, 32.01, 32.04, 35.93, 36.31, 36.70, 36.95, 37.14, 38.75, 39.44, 39.53, 39.64, 39.87, 40.88, 42.44, 43.01, 45.97, 50.14, 56.27, 56.82, 61.41, 67.20, 68.98, 69.29, 69.92, 70.33, 70.41, 70.77, 70.82, 71.01, 74.30, 101.48, 122.58, 140.01, 156.39, 169.69, 170.30, 170.40, 170.55, 172.19, 172.25, 172.34, 172.48, 172.55, 172.62, 172.95.

**1,28-Bis-{{rac-2,3-bis(tetradecyloxy)propyloxy}carbonylamino}-N<sup>12</sup>,N<sup>17</sup>-bis-[17-(β-D-galactopyranosyloxy)-4,9-diaza-12,15-dioxa-5,8-dioxoheptadecyl]-7,12,17,22-tetraaza-8,11,18,21-tetraoxooctacosane (1a).** To a solution of compound **11a** (46 mg, 0.017 mmol) in CHCl<sub>3</sub> (4 mL) 0.04 M MeONa in MeOH (1 mL) was added. A reaction mixture was stirred for 1 h at 24 °C, and solvents were removed in a vacuum. Column chromatography on a silica gel (CHCl<sub>3</sub> – MeOH – 1% aq. AcOH, 5 : 1 : 0.08) gave compound **1a** (29 mg, 72%) as a white amorphous solid. MALDI-TOFMS: *m/z* 2429.970 [M + Na]<sup>+</sup>. Calcd for C<sub>126</sub>H<sub>240</sub>N<sub>10</sub>NaO<sub>32</sub>: 2428.736 [M + Na]<sup>+</sup>. <sup>1</sup>H NMR (600 MHz, CD<sub>3</sub>Cl-CD<sub>3</sub>OD, 1:1): 0.80 (t, 12 H, *J* 6.1, 4 CH<sub>2</sub>CH<sub>3</sub>), 1.04-1.31 (m, 96 H, 4 (CH<sub>2</sub>)<sub>11</sub>, 2 NHCH<sub>2</sub>CH<sub>2</sub>(CH<sub>2</sub>)<sub>2</sub>), 1.34-1.75 (m, 24 H, 6 NCH<sub>2</sub>CH<sub>2</sub>, 4 OCH<sub>2</sub>CH<sub>2</sub> NCH<sub>2</sub>(CH<sub>2</sub>)<sub>2</sub>CH<sub>2</sub>N), 2.36-2.48 (m, 16 H, 4 C(O)CH<sub>2</sub>CH<sub>2</sub>C(O)), 2.98-3.14 (m, 12 H, 6 NHCH<sub>2</sub>), 3.19-3.76 (m, 54 H, 4 CH<sub>2</sub>N, 2 CH<sub>2</sub>NH, 2 CH<sub>2</sub>O(CH<sub>2</sub>)<sub>2</sub>OCH<sub>2</sub>, 2 OCH<sub>a</sub>H, 4 OCH<sub>2</sub>CH<sub>2</sub>, 2 OCH<sub>2</sub>CH, 2 H-5 Gal, 4 H-6 Gal, 2 H-3 Gal, 2 H-2 Gal), 3.80-3.83 (m, 2 H, 2 H-4 Gal), 3.97-4.04 (m, 4 H, 2 OCH<sub>b</sub>H, 2 CH<sub>a</sub>OC(O)), 4.07 (dd, 2 H, *J* 4.3, 11.7, 2 CH<sub>b</sub>OC(O)), 4.22 (d, 2 H, *J* 7.9, 2 H-1 Gal). <sup>13</sup>C NMR (150 MHz): 14.20, 20.68, 20.75, 20.77, 20.88, 22.77, 26.13, 26.19, 26.41, 26.51, 29.44, 29.59, 29.74, 29.78, 29.90, 30.11, 31.71, 32.00, 39.38, 39.50, 40.99, 54.90, 61.36, 64.27, 67.16, 68.95, 69.23, 69.89, 70.25, 70.33, 70.56, 70.68, 70.79, 70.94, 71.86, 76.99, 101.43, 156.58, 170.35, 170.52, 172.46, 172.56, 172.61, 172.68, 172.94.

**1,28-Bis-[(cholest-5-en-3β-yloxy)carbonylamino]-N<sup>12</sup>,N<sup>17</sup>-bis-[17-(β-D-galactopyranosyloxy)-4,9-diaza-12,15-dioxa-5,8-dioxoheptadecyl]-7,12,17,22-tetraaza-8,11,18,21-tetraoxooctacosane (1b)** was synthesized as described for **1a** starting from compound **11b** (17 мг, 0.0067 ммоль) and 0.04 M MeONa in MeOH (0.5 mL). Column chromatography on a silica gel (CHCl<sub>3</sub> – MeOH – 1% aq. AcOH, 5 : 1 : 0.08) gave compound **1b** (13 mg, 89%) as a white amorphous solid. [α]<sub>D</sub><sup>28</sup> -6.7 (*c* 0.5, CHCl<sub>3</sub> - CH<sub>3</sub>OH, 1 : 1). MALDI-TOFMS: *m/z* 2233.500 [M + Na]<sup>+</sup>. Calcd for C<sub>118</sub>H<sub>204</sub>N<sub>10</sub>NaO<sub>28</sub>: 2232.474 [M + Na]<sup>+</sup>. <sup>1</sup>H NMR (600 MHz, CD<sub>3</sub>Cl-CD<sub>3</sub>OD, 1:1): 0.61 (s, 6 H, 2 C(13)Me), 0.77 (d, 6 H, *J* 6.6, 2 C(25)Me), 0.79 (d, 6 H, *J* 6.6, 2 C(25)Me), 0.84 (d, 6 H, *J* 6.5, 2 C(20)Me), 0.94 (*c*, 6 H, 2 C(10)Me), 0.90 – 1.60 (m, 72 H, Chol protons, 6 NHCH<sub>2</sub>CH<sub>2</sub>, NCH<sub>2</sub>(CH<sub>2</sub>)<sub>2</sub>CH<sub>2</sub>N, 2 NHCH<sub>2</sub>CH<sub>2</sub>(CH<sub>2</sub>)<sub>2</sub>), 1.64-1.95 (m, 14 H, Chol protons), 2.15–2.29 (m, 4 H, 2 H<sub>2</sub>C(4) Chol), 2.36-2.60 (m, 16 H, 4 C(O)CH<sub>2</sub>CH<sub>2</sub>C(O)), 3.01 (t, 4 H, *J* 7.0), 3.07 (t, 6 H, *J* 7.0) and 3.14 (t, 2 H, *J* 6.5, 6 CH<sub>2</sub>NH), 3.19-3.74 (m, 40 H, 4 NCH<sub>2</sub>, 2 CH<sub>2</sub>CH<sub>2</sub>O(CH<sub>2</sub>)<sub>2</sub>OCH<sub>2</sub>CH<sub>2</sub>, 4 H-6 Gal, 2 H-3 Gal, 2 H-2 Gal), 3.82 (br. d, *J* 3.3, 2 H, 2 H-4 Gal), 3.98 (ddd, *J* 2.3, 5.0, 10.4, 2 H-5 Gal), 4.12-4.20 (m, 2 H, H(3) Chol), 4.21 (m, 2 H, *J* 7.7, 2 H-1 Gal), 5.23-5.32 (m, 2 H, H(6) Chol). <sup>13</sup>C NMR <sup>13</sup>C (150 MHz): 11.29, 18.14, 18.73, 20.67, 21.88, 22.13, 22.53, 23.42, 23.85, 25.99, 26.13, 27.58, 27.81, 28.06, 28.78, 28.92, 29.23, 29.30, 30.86, 30.99, 31.52, 31.56, 35.44, 35.81, 36.21, 36.38, 36.42, 36.68, 38.22, 38.83, 39.01, 39.14, 39.43, 40.16, 41.96, 49.81, 55.85, 56.42, 60.93, 67.84, 68.64, 69.47, 69.66, 69.71, 69.75, 69.77, 70.89, 70.91, 73.13, 74.02, 74.85, 76.95, 77.16, 77.16, 77.37, 103.00, 122.05, 139.55, 156.84, 172.15, 172.39, 172.70, 172.85, 173.15, 173.21.

## Structure of polycationic lipid 2D3 and zwitter-ionic lipid DOPE

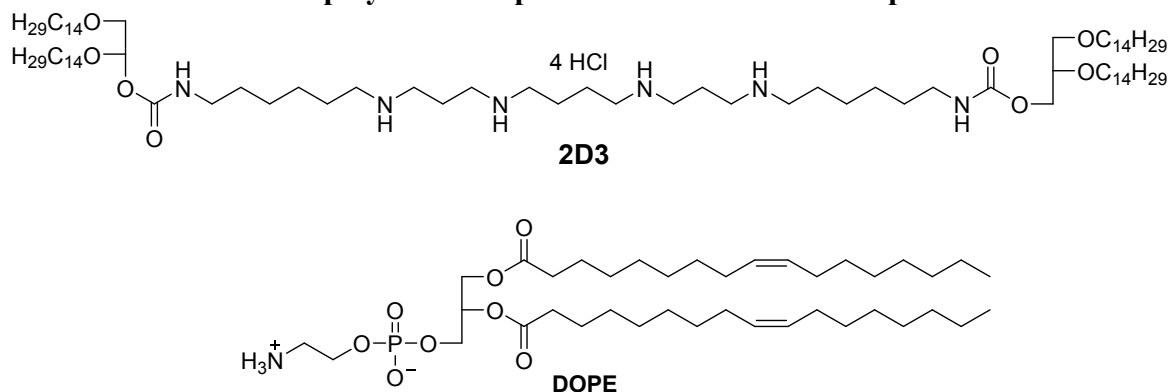

### Preparation of liposomes

The non-targeted liposomes 2D3-DOPE (**L0**) were composed of lipid 2D3 and DOPE (1,2-dioleoyl-*sn*-glycero-3-phosphoethanolamine, Avanti Polar Lipids, USA) at a 1 : 1 molar ratio. To prepare the targeted liposomes, 2.5, 5 or 10% mol. of galactose-containing lipids **1a** were added to the core liposomes 2D3-DOPE. All liposomal formulations were made by the hydration of lipid thin-film followed by sonication. Briefly, cationic lipid 2D3, DOPE and lipid **1a** were dissolved in chloroform-methanol (1 : 1 v/v) mixture and gently agitated. The solvents were carefully evaporated and the residue was dried under a vacuum (0.01 Torr) for 2-3 h. The obtained lipid film was hydrated in deionised water (MilliQ) for 4 h at 4 °C, and then the lipid suspensions were sonicated for 15 min at 65–70 °C in a bath-type sonicator (Bandelin Sonorex Digitec DT 52H, Germany). In the resulting dispersion, the cationic lipid 2D3 concentration was 1 mM.

### Cytotoxicity of liposomes estimated by MTT test

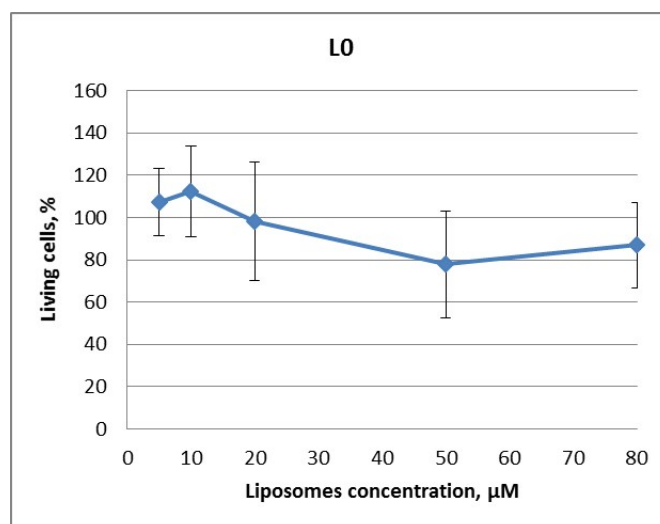

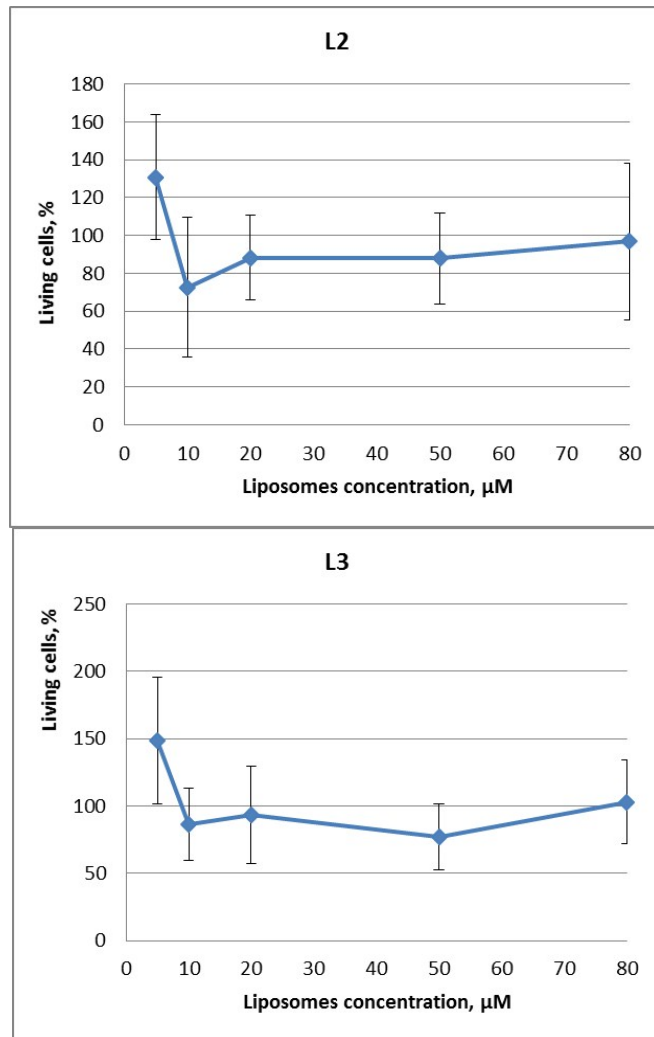

### Localization of FITC-labeled oligonucleotide

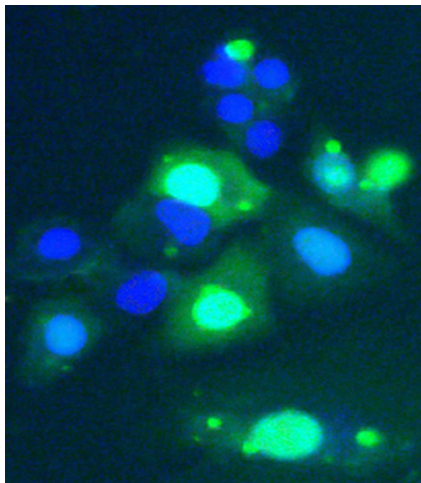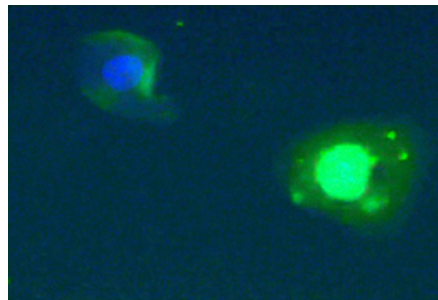

Localization of FITC-labeled oligonucleotide in Hep G2 cells after 4 h incubation with FITC-ODN/L2 lipoplexes using InCell Analyser. Green signal corresponds to the FITC-labeled oligonucleotide; blue signal, to the nuclei stained with DAPI.

# NMR spectra of compounds synthesized

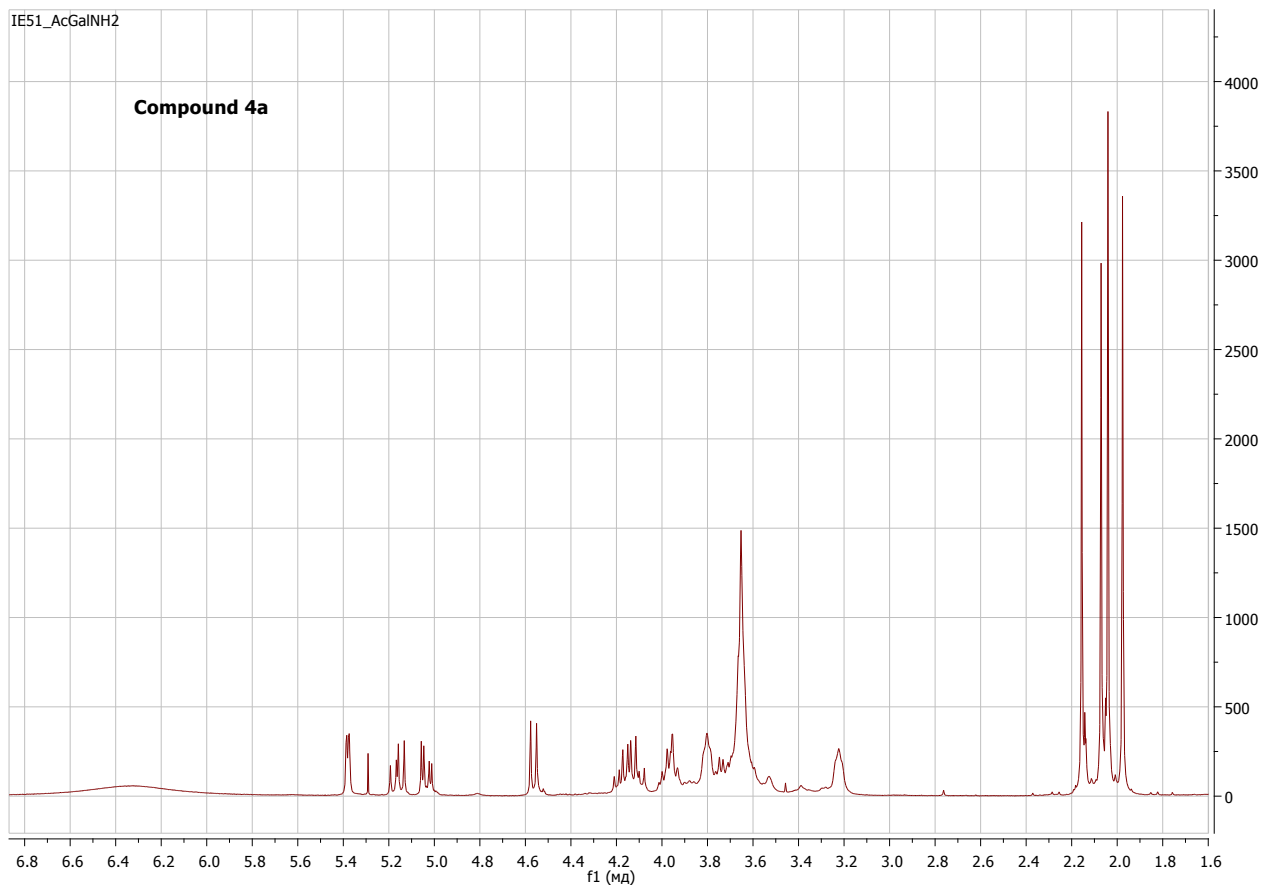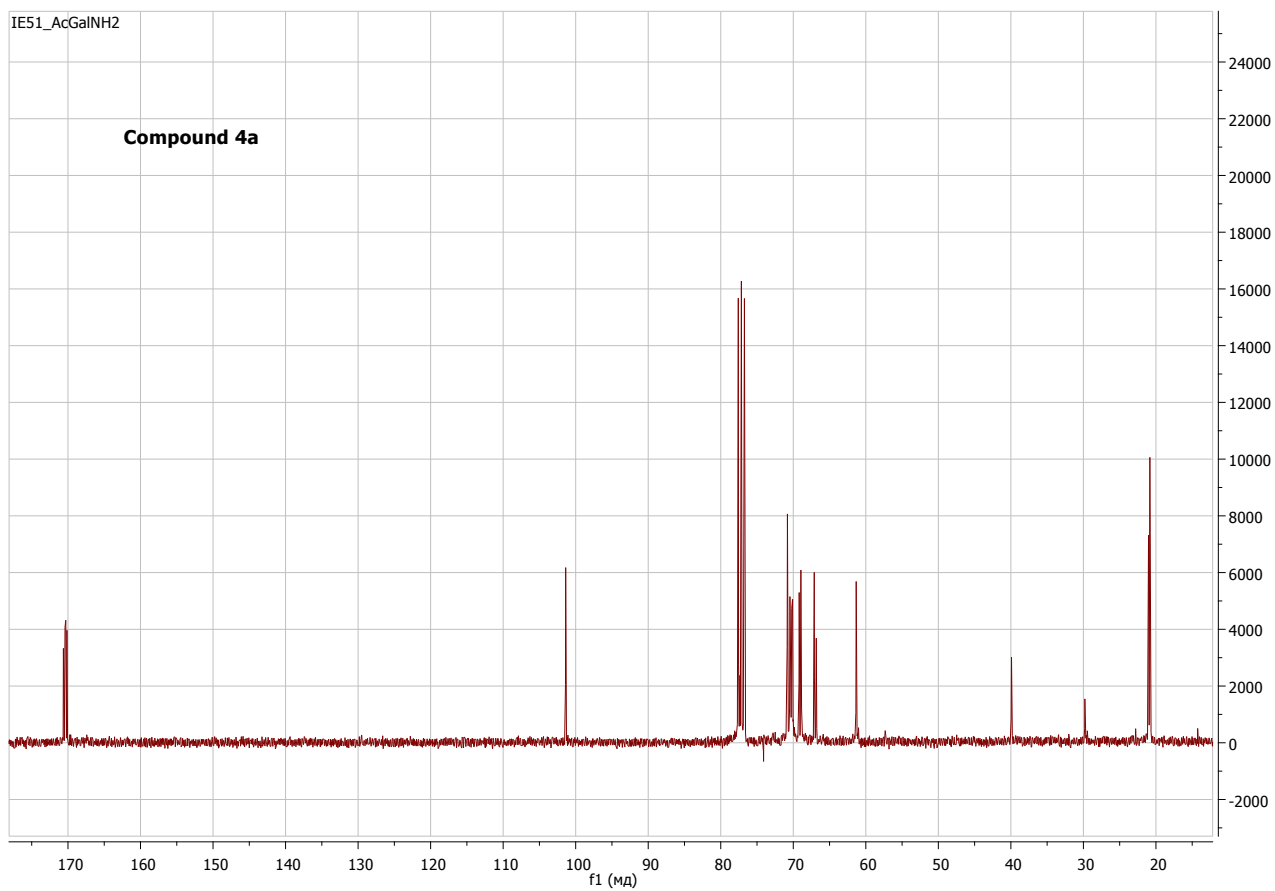



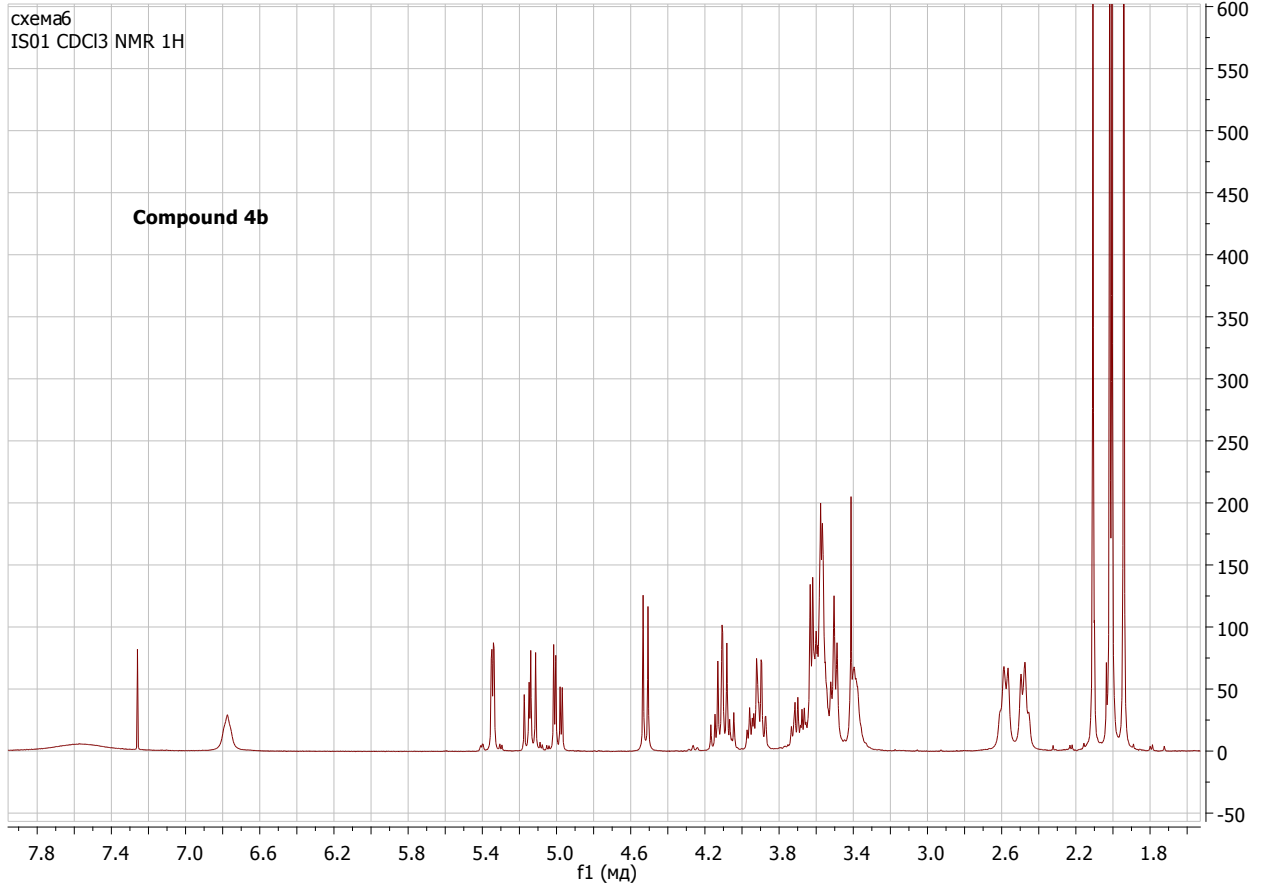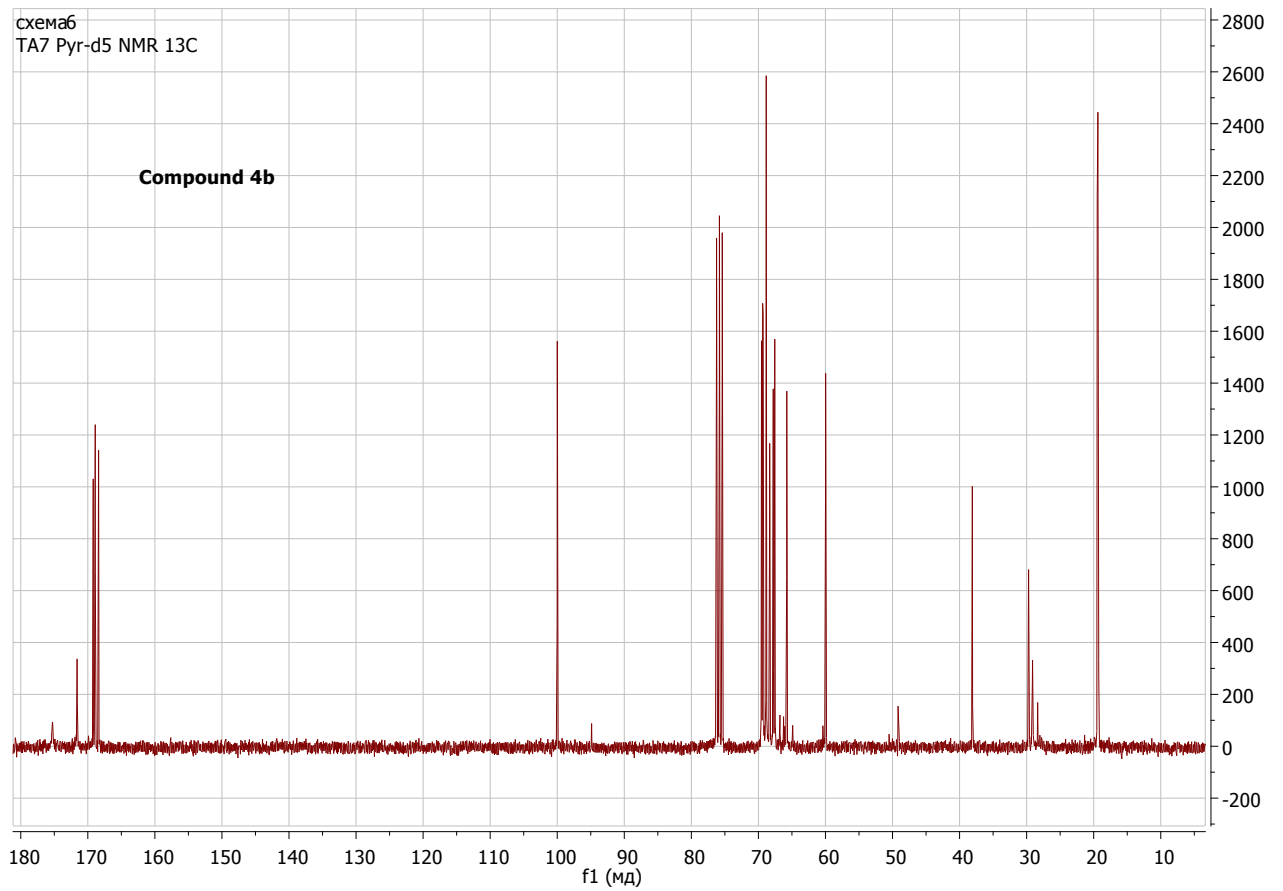

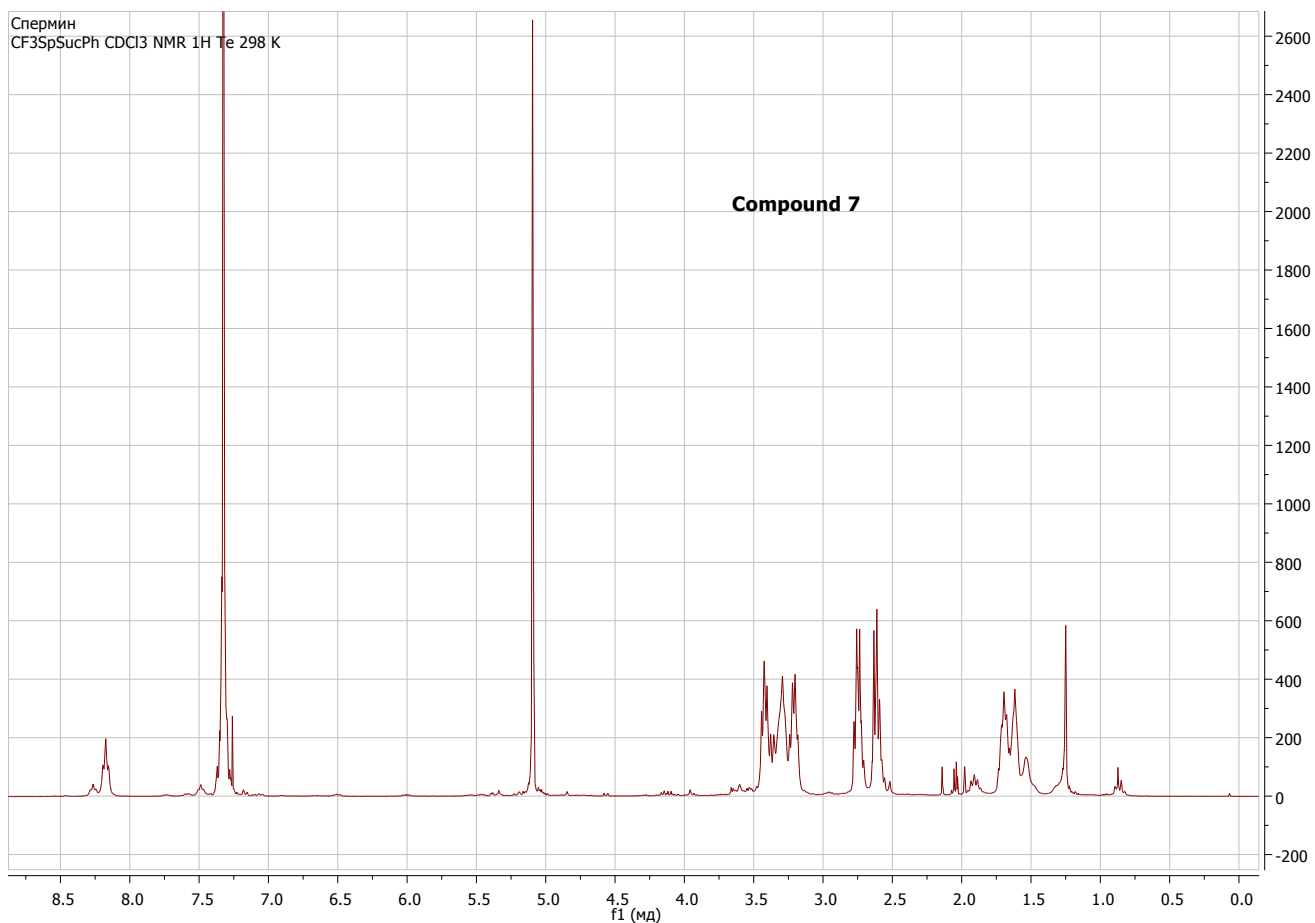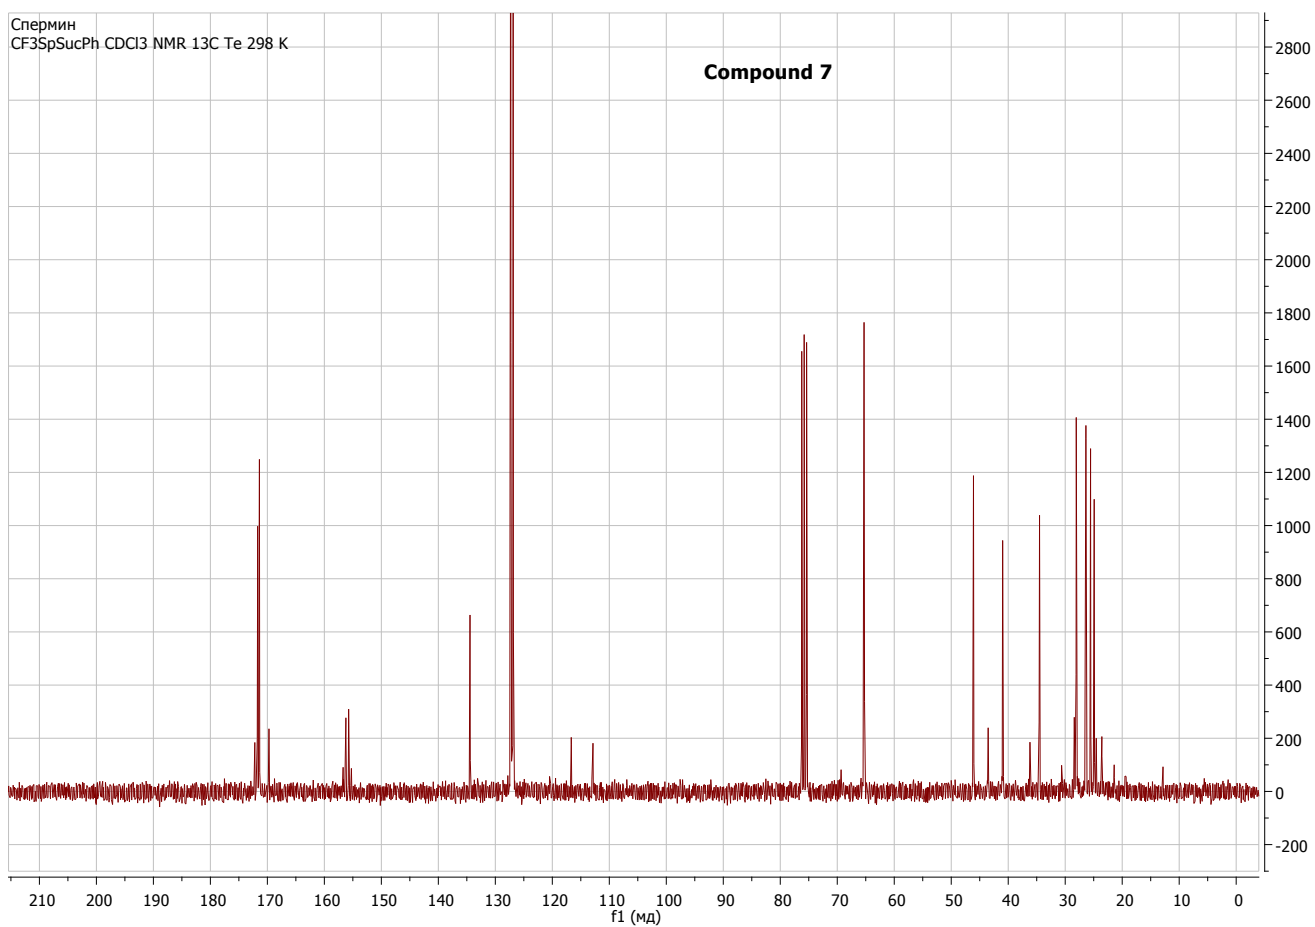

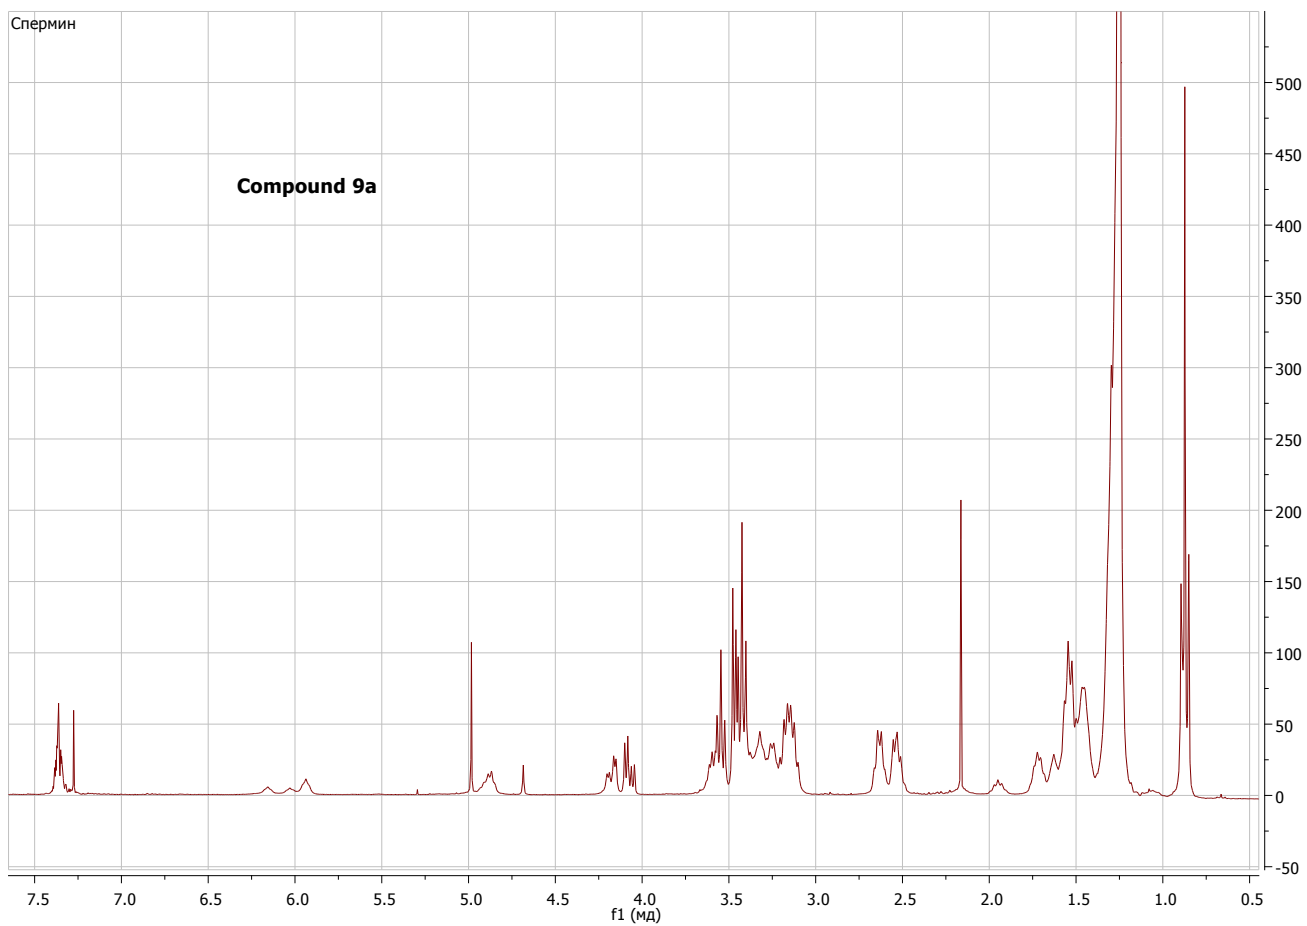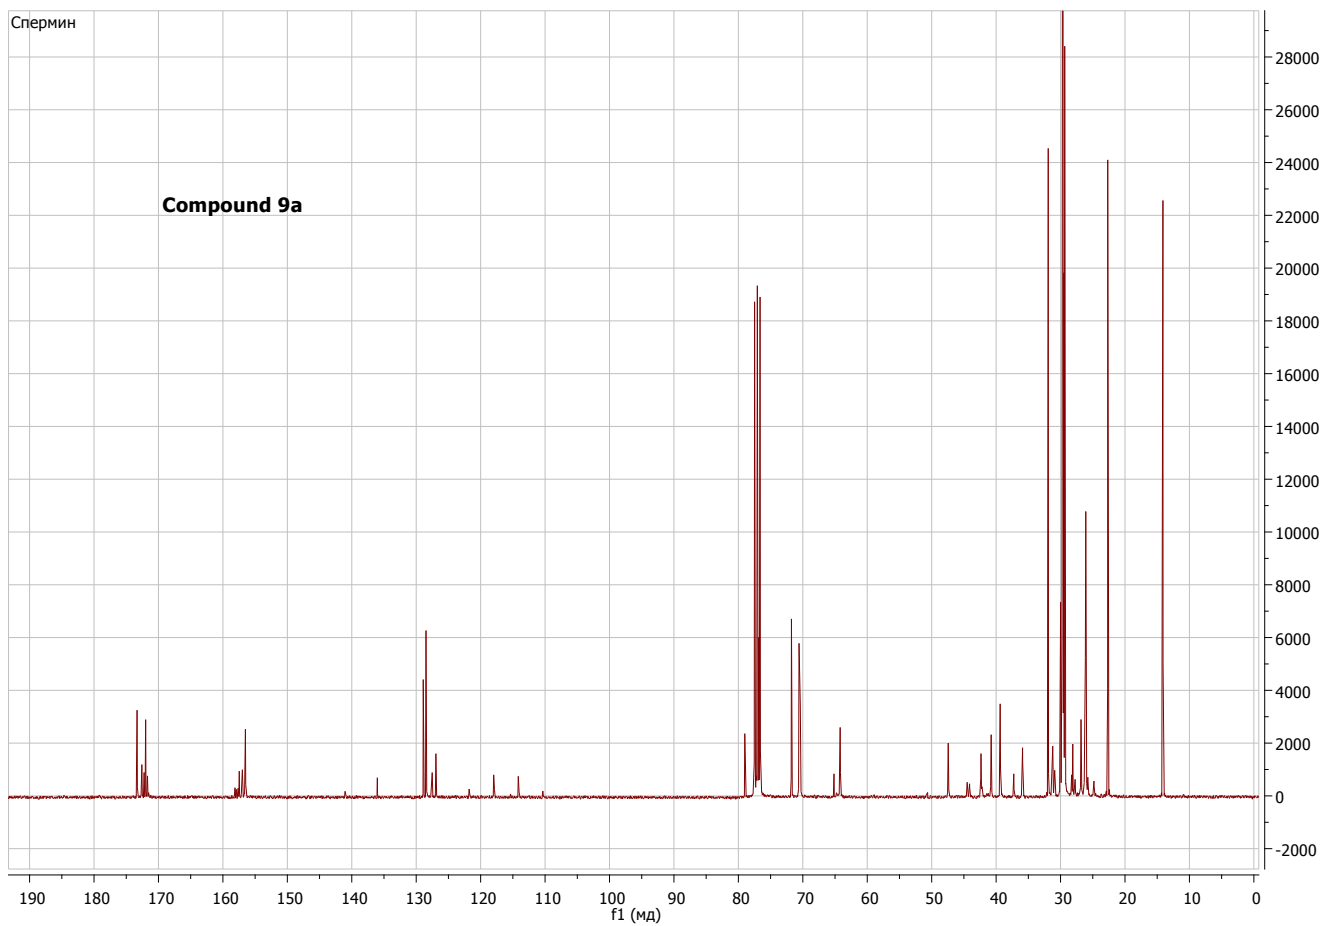

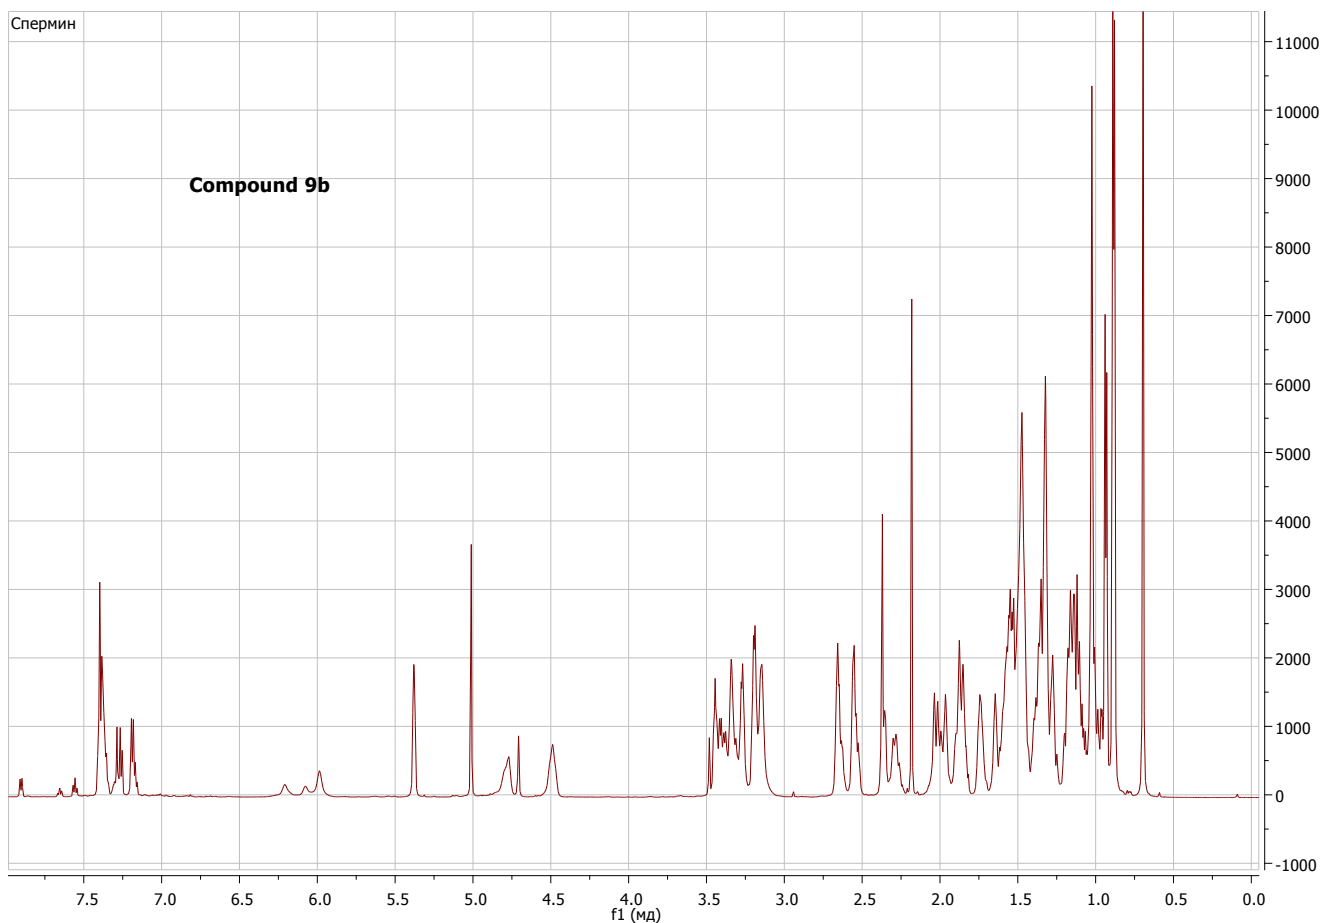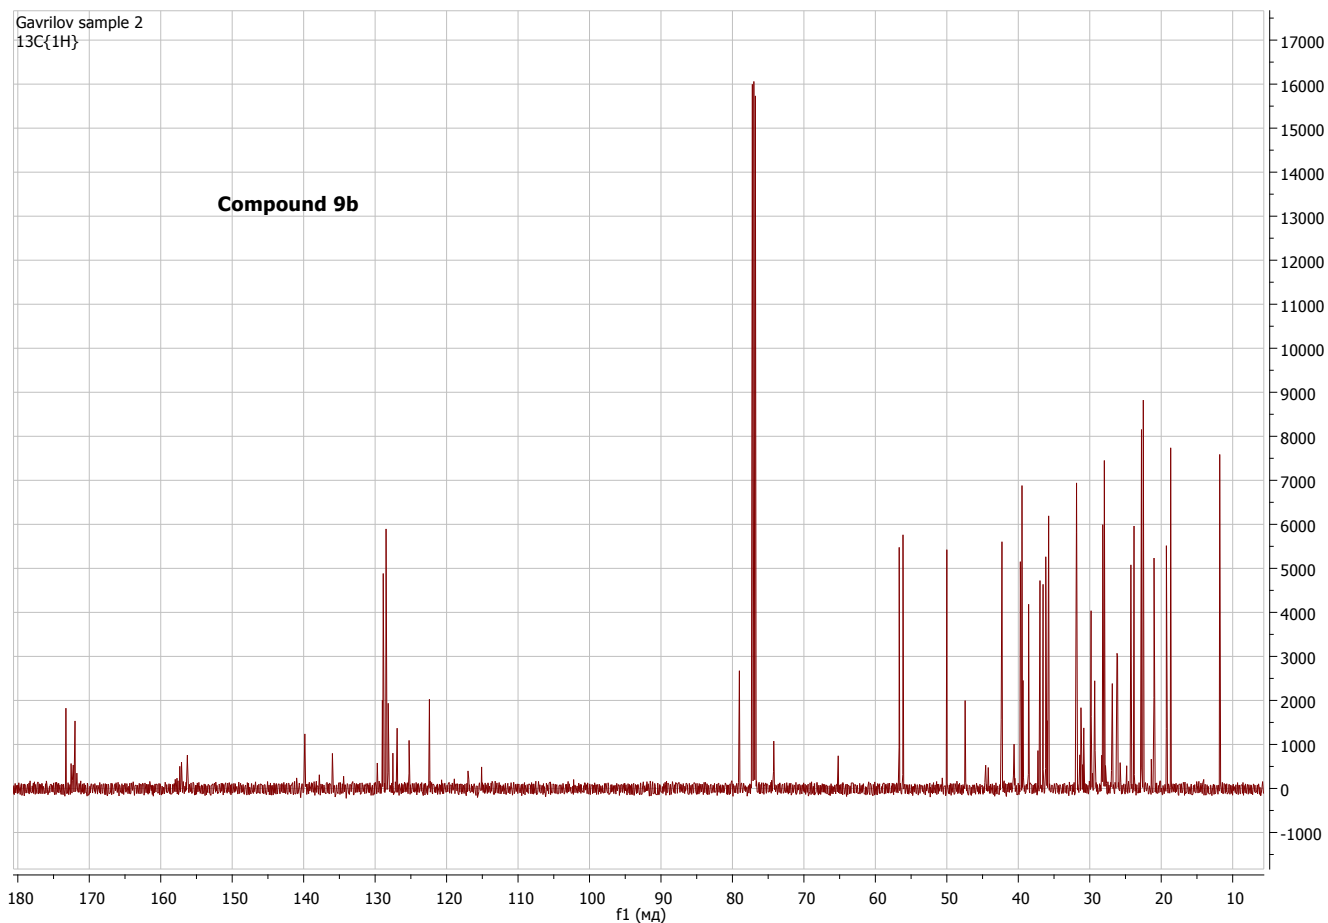

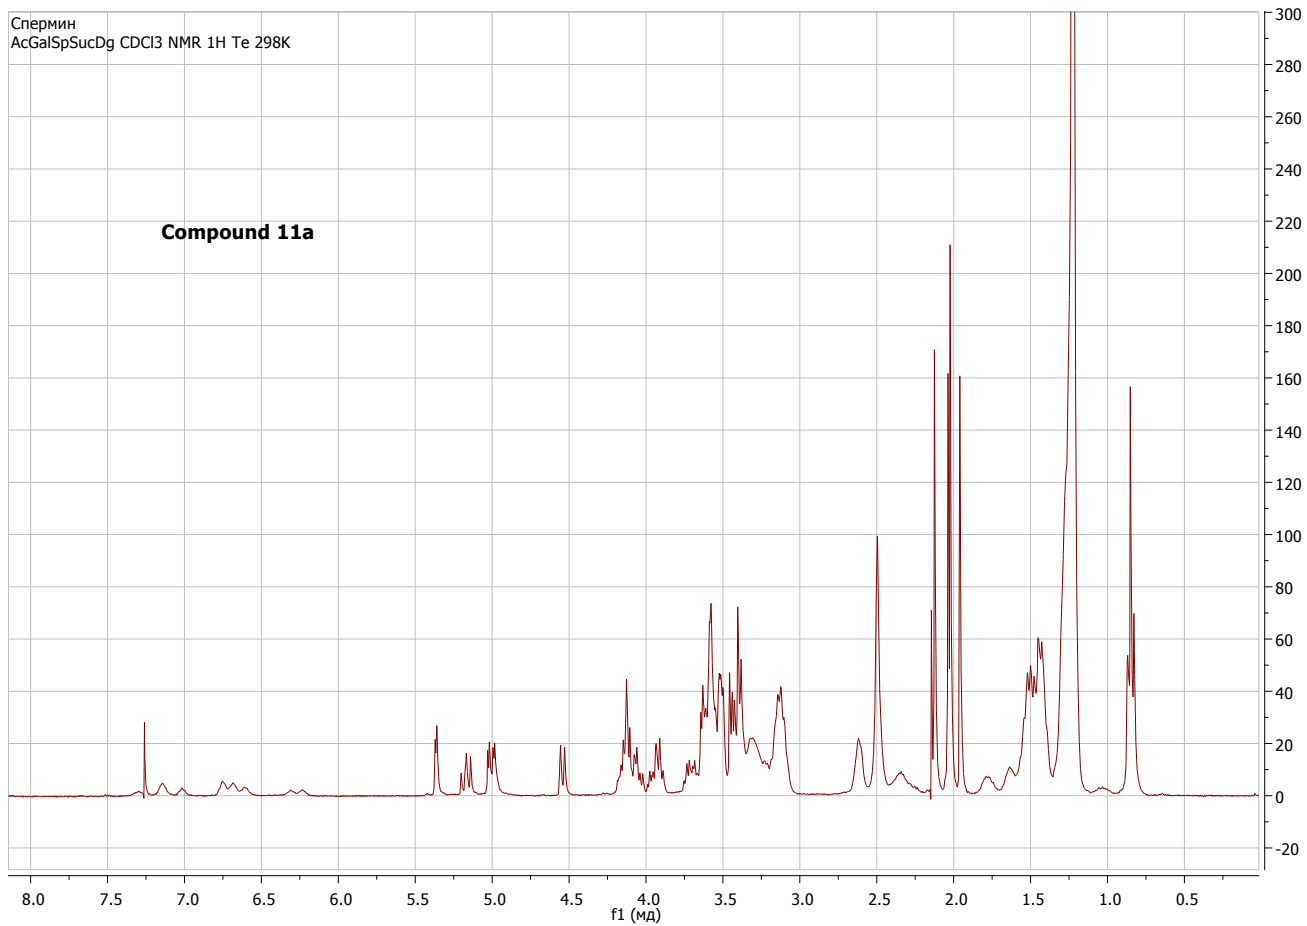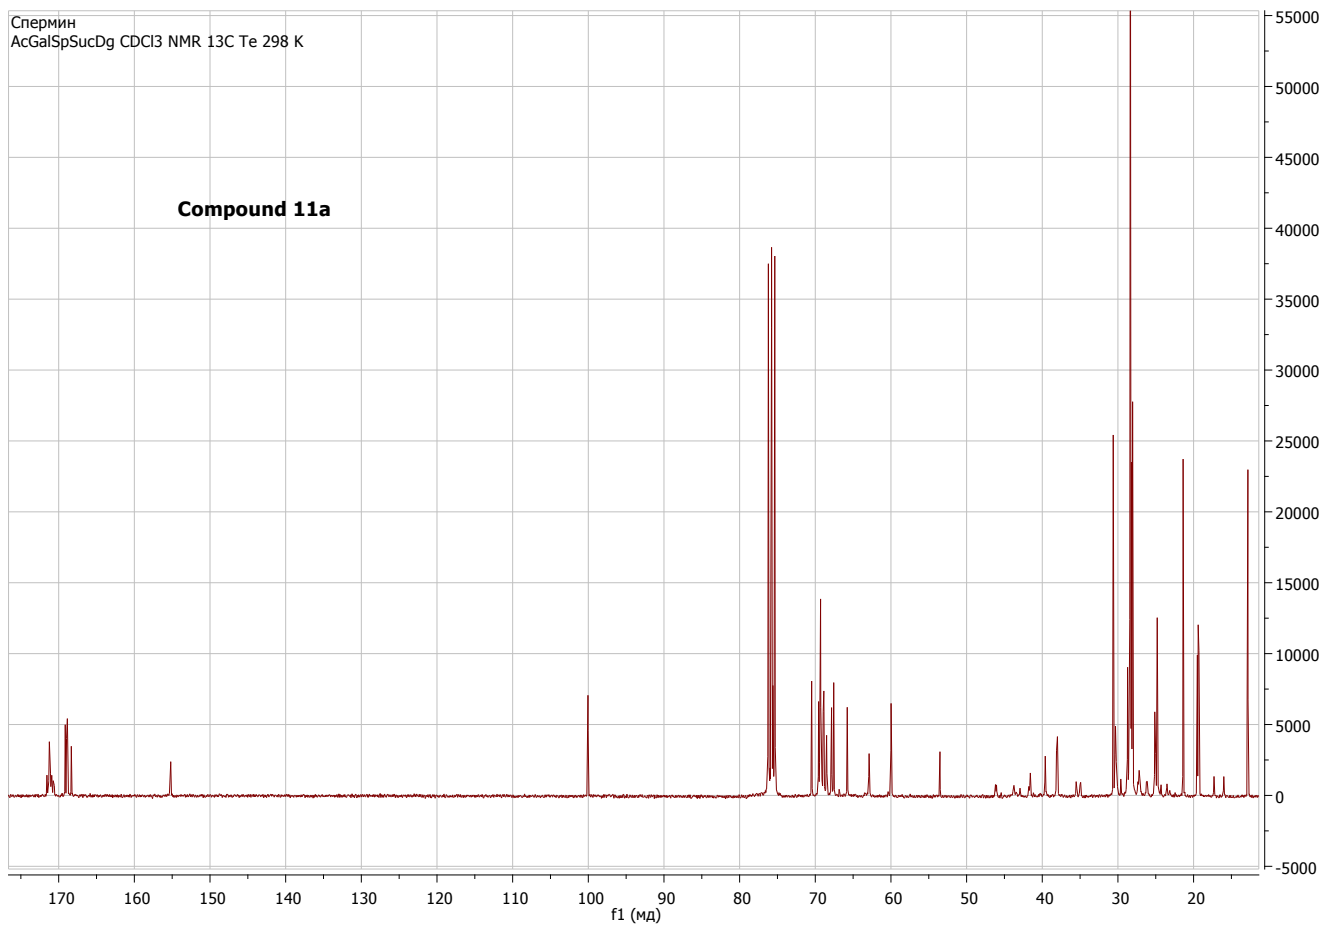

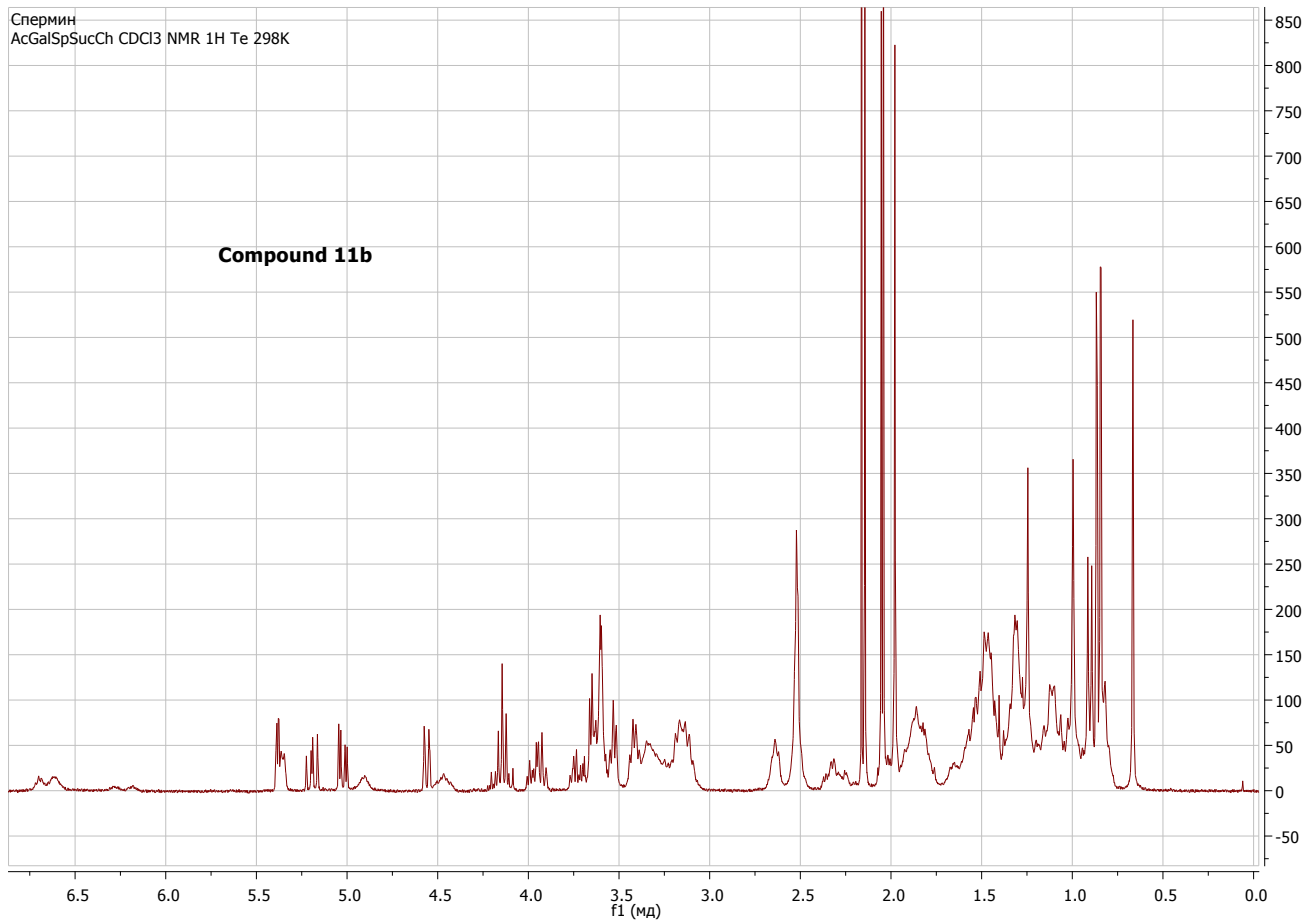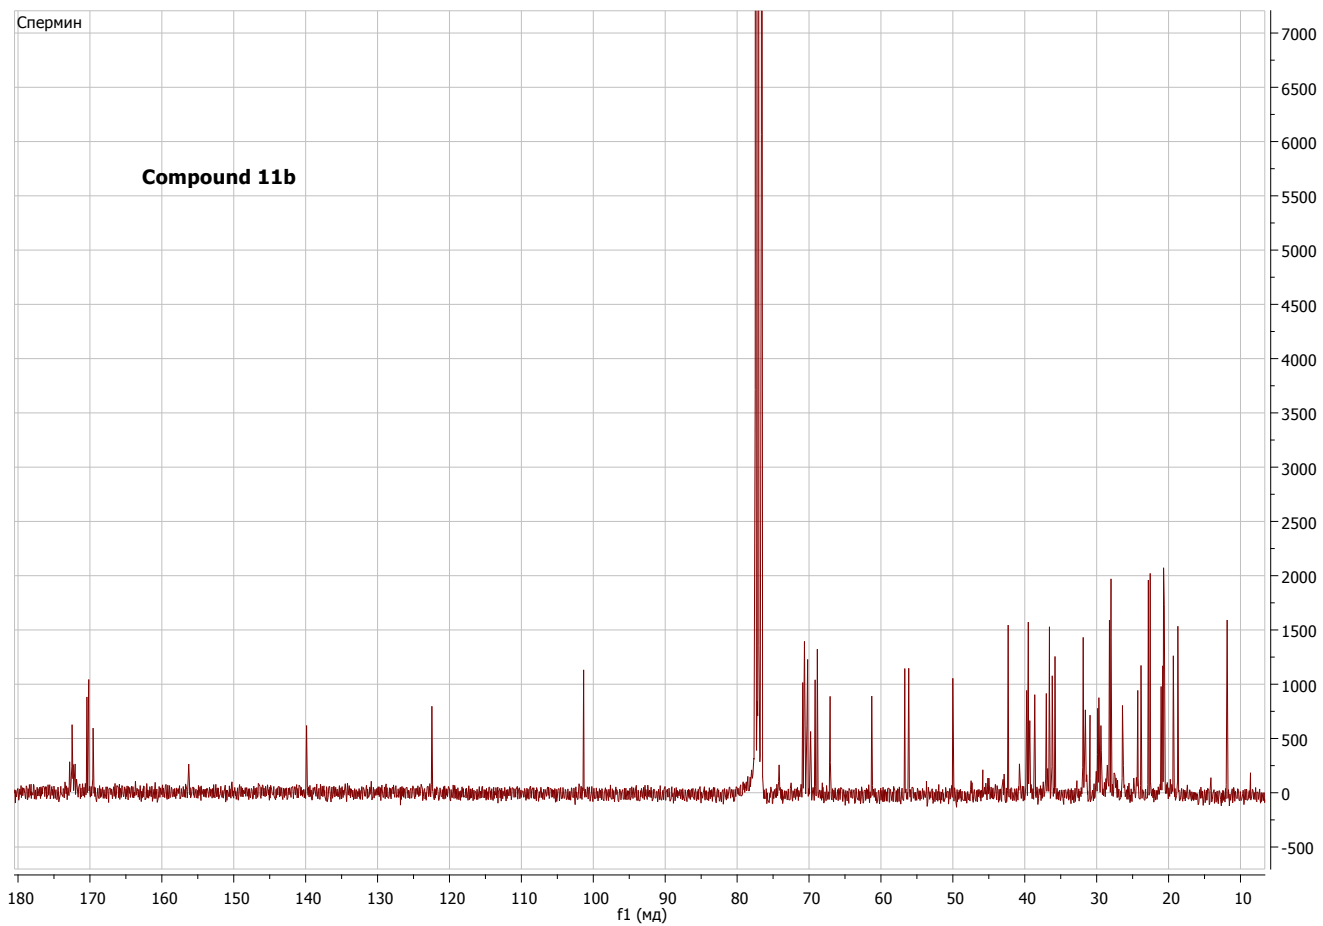

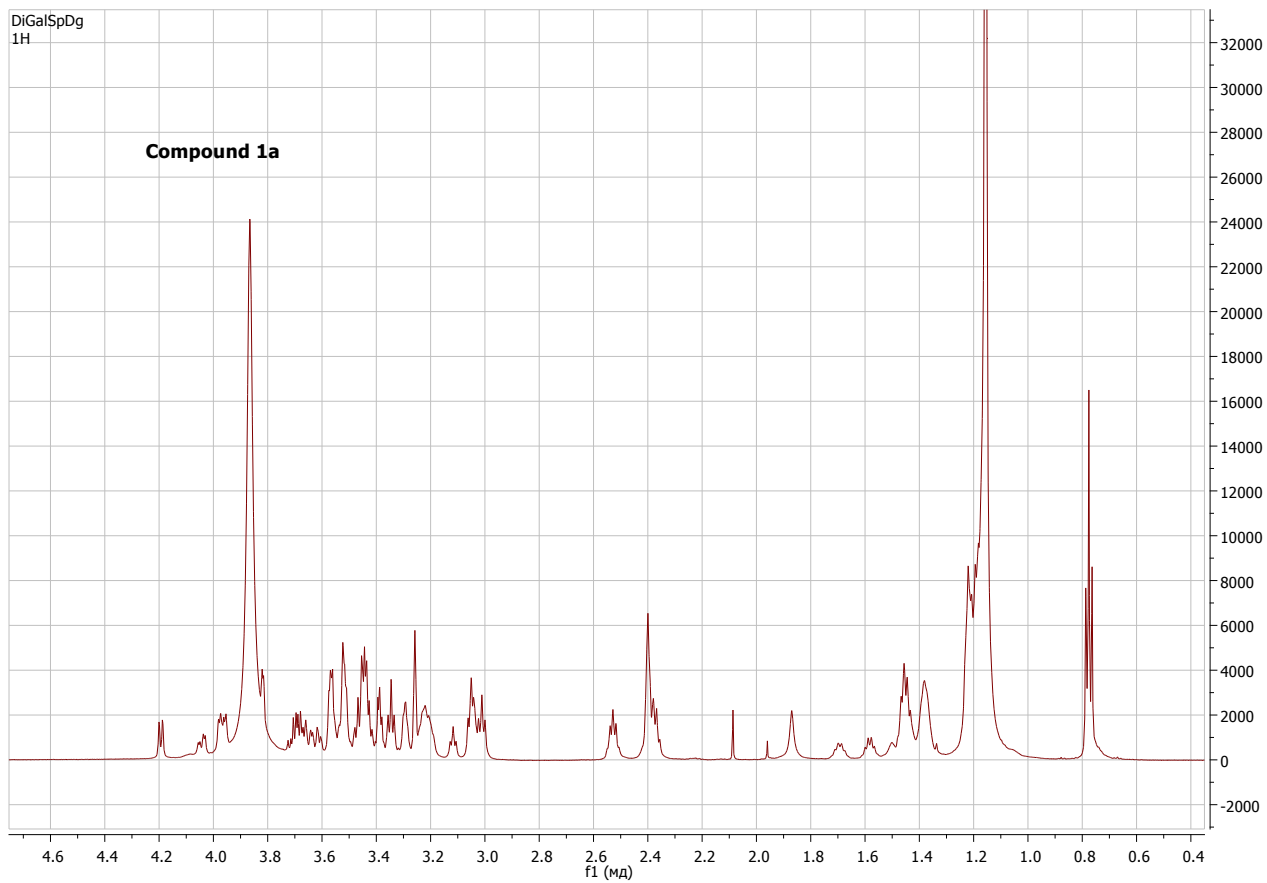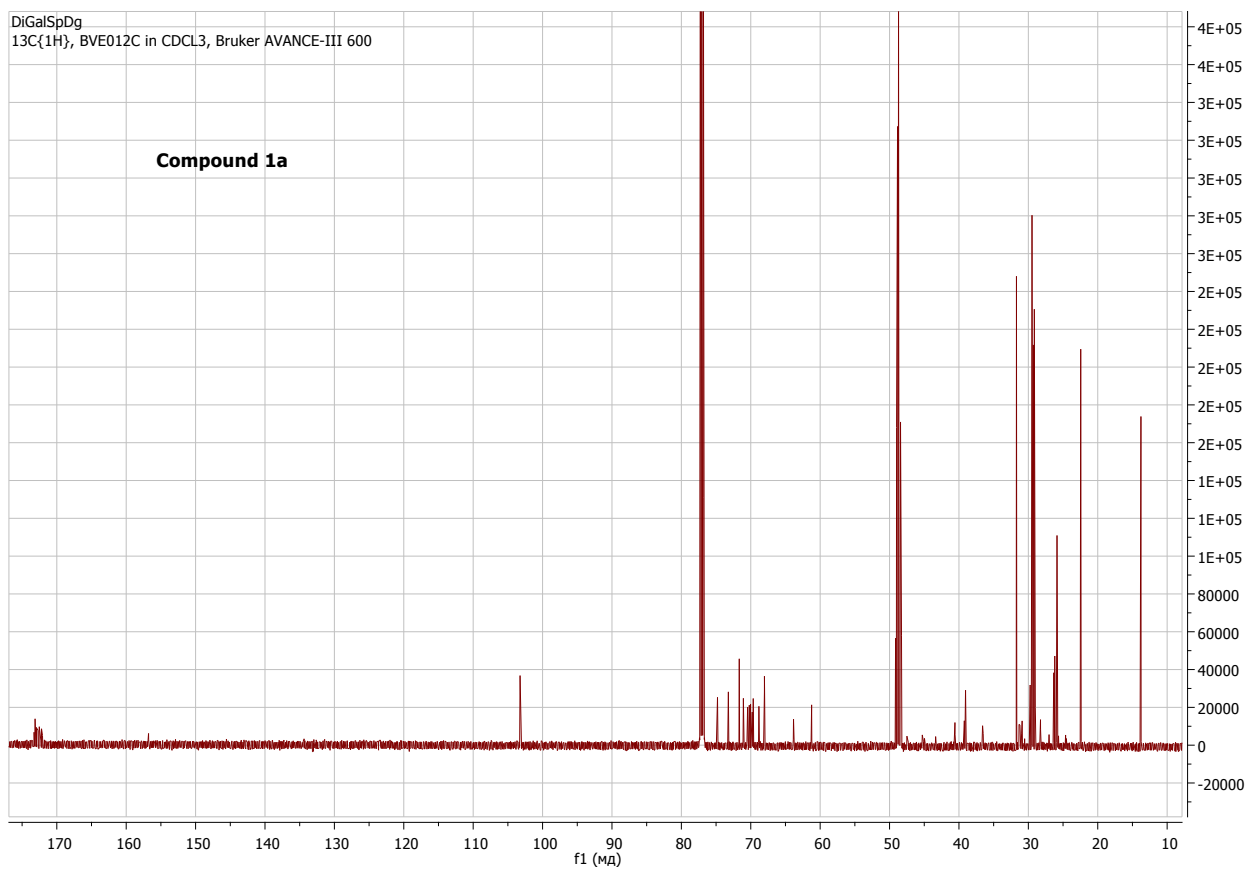

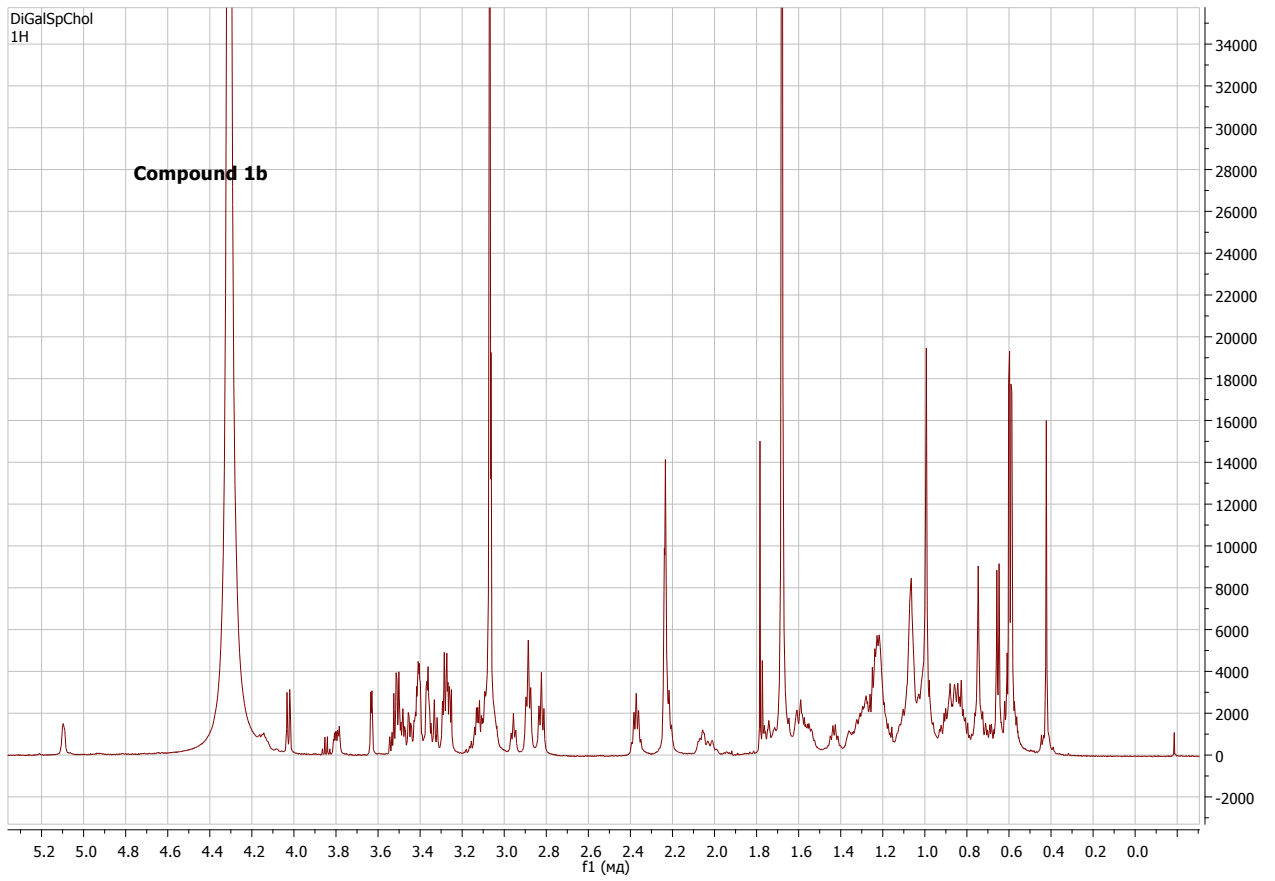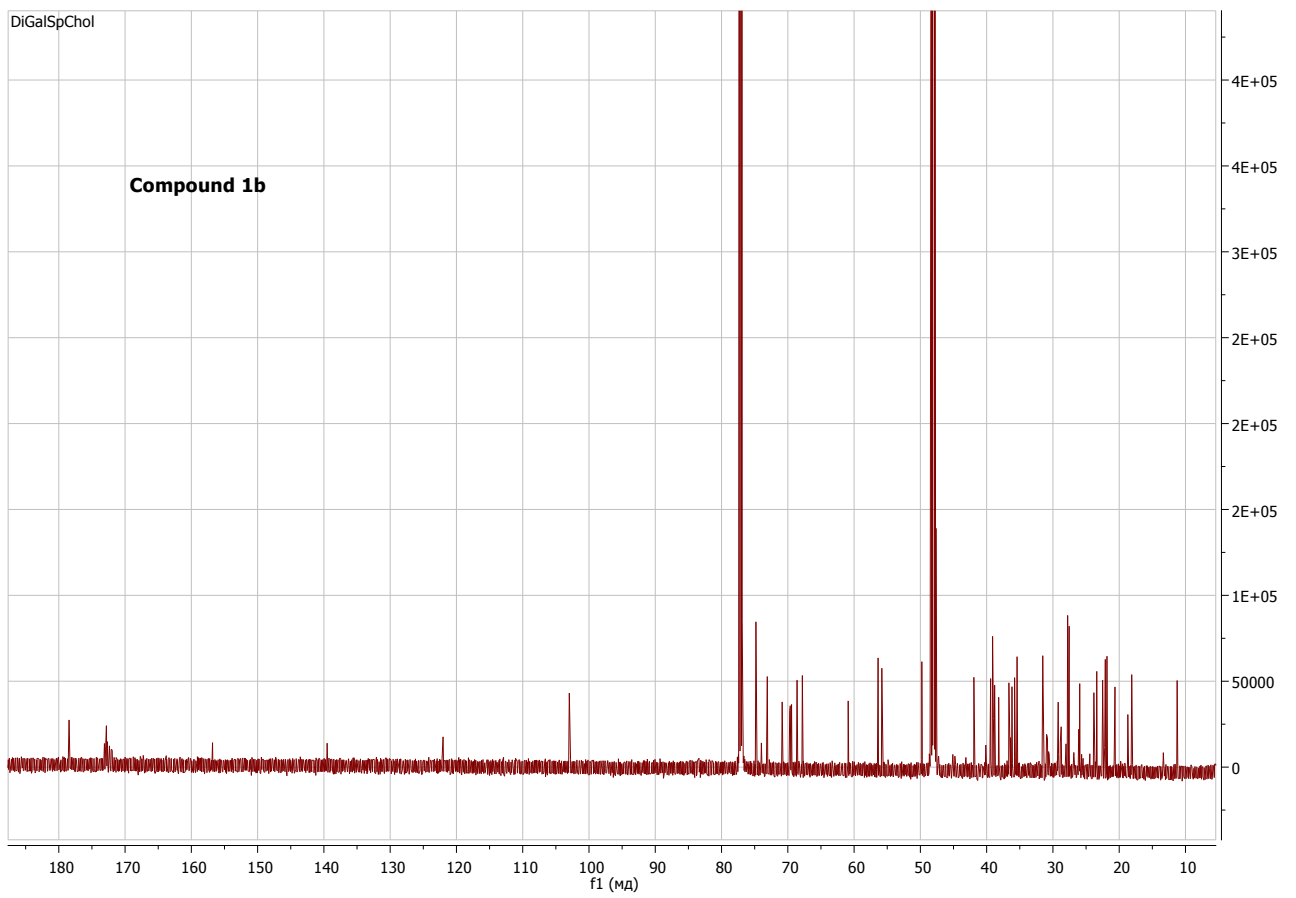

Supplement: c5ra17389b1.pdf [file c5ra17389b1.pdf]
